# 1 Coevolutionary dynamics via 2 adaptive feedback in collective-risk 3 social dilemma game

4 Linjie Liu<sup>1,2</sup>, Xiaojie Chen<sup>2,\*</sup>, Attila Szolnoki<sup>3</sup>

\*For correspondence:

[xiaojiechen@uestc.edu.cn](mailto:xiaojiechen@uestc.edu.cn) (XC)

5 <sup>1</sup>College of Science, Northwest A & F University, Yangling 712100, China; <sup>2</sup>School of  
6 Mathematical Sciences, University of Electronic Science and Technology of China,  
7 Chengdu 611731, China; <sup>3</sup>Institute of Technical Physics and Materials Science, Centre  
8 for Energy Research, P.O. Box 49, H-1525 Budapest, Hungary

---

9  
10 **Abstract** Human society and natural environment form a complex giant ecosystem, where  
11 human activities not only lead to the change of environmental states, but also react to them. By  
12 using collective-risk social dilemma game, some studies have already revealed that individual  
13 contributions and the risk of future losses are inextricably linked. These works, however, often  
14 use an idealistic assumption that the risk is constant and not affected by individual behaviors. We  
15 here develop a coevolutionary game approach that captures the coupled dynamics of  
16 cooperation and risk. In particular, the level of contributions in a population affects the state of  
17 risk, while the risk in turn influences individuals' behavioral decision-making. Importantly, we  
18 explore two representative feedback forms describing the possible effect of strategy on risk,  
19 namely, linear and exponential feedbacks. We find that cooperation can be maintained in the  
20 population by keeping at a certain fraction or forming an evolutionary oscillation with risk,  
21 independently of the feedback type. However, such evolutionary outcome depends on the initial  
22 state. Taken together, a two-way coupling between collective actions and risk is essential to avoid  
23 the tragedy of the commons. More importantly, a critical starting portion of cooperators and risk  
24 level is what we really need for guiding the evolution toward a desired direction.

---

## 26 Introduction

27 Human activities constantly affect the natural environment and cause changes in its quality, which  
28 in turn affects our daily life and health conditions (*Patz et al., 2005; Steffen et al., 2006; Perc et al.,*  
29 *2017; Obradovich et al., 2018; Hilbe et al., 2018; Su et al., 2019, 2022*). A well-known example is  
30 climate change, which is one of the biggest contemporary challenges of our civilization (*Parmesan*  
31 *and Yohe, 2003; Stone et al., 2013*). A large number of carbon emissions caused by human activities  
32 will exacerbate the greenhouse effect, which risks raising global temperatures to dangerous levels.  
33 The direct consequences of global warming are the melting of glaciers and the rise of sea level,  
34 which will inevitably affect human activities (*Schuur et al., 2015; Obradovich and Rahwan, 2019;*  
35 *Moore et al., 2022*). Similarly, we can give more examples of coupled human and natural systems  
36 to continue this list, such as habitat destruction and the spread of infectious diseases (*Liu et al.,*  
37 *2001, 2007; Chen and Fu, 2019; Tanimoto, 2021; Chen and Fu, 2022*). At present, the importance  
38 of developing a new comprehensive framework to study the coupling between human behavior  
39 and the environment has been recognized by number of interdisciplinary approaches (*Weitz et al.,*  
40 *2016; Chen and Szolnoki, 2018; Tilman et al., 2020*).

41 Evolutionary game theory provides a powerful theoretical framework for studying the coupled  
42 dynamics of human and natural systems (*Maynard Smith, 1982; Weibull, 1997; Stewart and Plotkin,*  
43 *2014; Radzvilavicius et al., 2019; Park et al., 2020; Niehus et al., 2021; Han et al., 2021; Cooper et al.,*  
44 *2021*). Furthermore, coevolutionary game models have recognized the fact that individual payoff  
45 values are closely related to the state of the environment (*Weitz et al., 2016; Szolnoki and Chen,*  
46 *2018; Chen and Szolnoki, 2018; Hauert et al., 2019; Tilman et al., 2020; Wang and Fu, 2020; Yan*  
47 *et al., 2021*). For example, Weitz et al. (*Weitz et al., 2016*) considered the dynamical changes of  
48 the environment, which modulates the payoffs of individuals. Their results show that individual  
49 strategies and the environmental state may form a sustained cycle where strategy swing between  
50 full cooperation and full defection, while the environment state oscillates between the replete state  
51 and the depleted state. Along this line, feedback-evolving game systems with intrinsic resource  
52 dynamics (*Tilman et al., 2020*), asymmetric interactions in heterogeneous environments (*Hauert*  
53 *et al., 2019*), and time-delay effect (*Yan et al., 2021*) have been also investigated where periodic  
54 oscillation of strategy and environment are observed. As a general conclusion, the feedback loop  
55 between individual strategies and related environment is a key element to maintain long-term  
56 cooperation and sustainable use of resources.

57 Despite of the mentioned efforts, the research on possible consequences of the feedback be-  
58 tween human activity and natural systems is still in early stage. Staying at the above mentioned  
59 example, potential feedback loops between human activities and climate change exist (*Obradovich*  
60 *and Rahwan, 2019*). However, most scholars study these two topics, that is, human contributions  
61 to climate change and social impacts of the changing climate on human behavior, in a separated  
62 way (*Vitousek et al., 1997; Barfuss et al., 2020*). On the one hand, some of them usually focus  
63 on how human behaviors (use of land, oceans, fossil fuel, freshwater, etc.) affect environment  
64 (*Vitousek et al., 1997*). On the other hand, researchers who are interested in society and biology  
65 frequently focus on how environmental change will affect human behaviors (*Culler et al., 2015;*  
66 *Obradovich and Rahwan, 2019; Celik, 2020*). Recently, these two approaches have been merged  
67 into a single framework, called as collective-risk social dilemma game, which serves as a general  
68 paradigm for studying climate change dilemmas (*Milinski et al., 2008*). Within it, a group of in-  
69 dividuals decide whether to contribute to reach a collective goal. If the total contributions of all  
70 individuals exceed a certain threshold, then the disaster is averted and all individuals benefit from  
71 it. Otherwise, the disaster occurs with a probability (also known as the risk of collective failure),  
72 resulting in fatal economic losses for all participants. Both behavioral experiments and theoretical  
73 works show that the risk of future losses plays an important role in the evolution of cooperation  
74 (*Milinski et al., 2008; Santos and Pacheco, 2011; Chen et al., 2012a; Vasconcelos et al., 2013; Hilbe*  
75 *et al., 2013; Vasconcelos et al., 2014; Barfuss et al., 2020; Domingos et al., 2020; Sun et al., 2021;*  
76 *Chica et al., 2022*).

77 Previous studies based on the collective-risk dilemma game revealed that the risk of collective  
78 failure could affect individuals' motivation to cooperate when they face to the problem of collective  
79 action, but ignored an important practical aspect. That is, human decision-making is not only af-  
80 fected by changes in the risk state, but also affects the level of risk (*Chen et al., 2012a*). Indeed, the  
81 risk of collective failure is lower in a highly cooperative society, but becomes significant in the oppo-  
82 site case. This fact is not only reflected in climate change (*Moore et al., 2022*), but also in the spread  
83 of infectious diseases (*Chen and Fu, 2022*) and vaccination (*Nichol et al., 1998; Chen and Fu, 2019*).  
84 Furthermore, although the risk level varies in a changing population, their relation is not necessar-  
85 ily straightforward. For example, a study revealed that the infection-fatality risk (IFR) of COVID-19  
86 in India decreased linearly from June 2020 to September 2020 due to improved healthcare or in-  
87 creased vaccination (*Yang and Shaman, 2022*). Throughout the whole process (from March 2020  
88 to April 2021), the statistical curve of IFR is nonlinear, that is, when the epidemic broke out, the  
89 value of IFR remained at a high level, and then with the increase of vaccination or the improve-  
90 ment of healthcare, the IFR value gradually decreased, then flattened and remained at a low level  
91 (*Yang and Shaman, 2022*). On the other hand, the change of risk is bound to affect individuals'

92 decision-making, which has been confirmed in behavioral experiments and theoretical research  
93 (*Milinski et al., 2008; Pacheco et al., 2014*). Though potential feedback loops between strategy and  
94 risk of future losses are already recognized, a study focusing on their direct interaction is missing.  
95 Furthermore, it is still an open question whether the character of feedback mechanism plays an  
96 essential role in the final evolutionary outcome. Hence, how the impacts of risk on human systems  
97 might, in turn, alter the future trajectories of human decision-making remains largely unexplored.

98 To fill this gap, we propose a coupled coevolutionary game framework based on the collective-  
99 risk dilemma to describe reciprocal interactions and feedbacks between decision-making proce-  
100 dure of individuals and risk. In particular, we assume that the increasing free-riding behaviors will  
101 slowly increase the risk of collective failure, and the resulting high-risk level will in turn stimulate  
102 individual contributions. However, the increase in contribution will gradually reduce the risk of col-  
103 lective failure, and the resulting low-risk level will promote the prevalence of free-riding behaviors  
104 again. This general feedback loop is illustrated in Fig. 1. Importantly, we respectively consider two  
105 conceptually different feedback protocols describing the effect of strategy on risk. Namely, both  
106 linear and highly nonlinear (exponential) feedback forms are checked. Our analysis identifies the  
107 conditions for the existence of stable interior equilibrium and stable limit cycle dynamics in both  
108 cases.

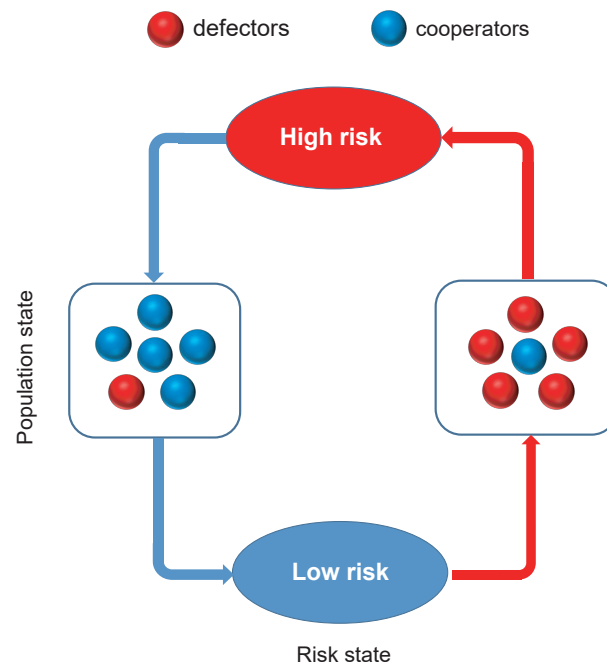

**Figure 1.** Coevolutionary feedback loop of population and risk states in the coupled game system. The meaning of colors is explained in the legend on the top.

## 109 **Methods and Materials**

### 110 **Collective-risk social dilemma game**

111 We consider an infinite well-mixed population in which  $N$  individuals are selected randomly to form  
112 a group for playing the collective-risk social dilemma game. Each individual in the group has an  
113 initial endowment  $b$  and can choose one of the two strategies, i.e., cooperation and defection. Co-  
114 operators will contribute an amount  $c$  to the common pool, whereas defectors contribute nothing.  
115 The remaining endowments of all individuals can be preserved if the overall number of coopera-

116 tors exceeds a threshold value  $M$ , where  $1 < M < N$  (*Milinski et al., 2008; Santos and Pacheco,*  
 117 **2011**). Otherwise, individuals will lose all their endowments with a probability  $r$ , which character-  
 118 izes the risk level of collective failure. Accordingly, the payoffs of cooperators and defectors in a  
 119 group of size  $N$  with  $j_C$  cooperators and  $N - j_C$  defectors can be summarized as

$$P_C = b\theta(j_C + 1 - M) + (1 - r)b[1 - \theta(j_C + 1 - M)] - c, \quad (1)$$

$$P_D = b\theta(j_C - M) + (1 - r)b(1 - \theta(j_C - M)), \quad (2)$$

120 where  $\theta(x)$  is the Heaviside function, that is,  $\theta(x) = 0$  if  $x < 0$ , being one otherwise.

121 To analyze the evolutionary dynamics of strategies in an infinite population, we use replicator  
 122 equations to describe the time evolution of cooperation (*Taylor and Jonker, 1978; Schuster and*  
 123 *Sigmund, 1983*). Accordingly, we have

$$\dot{x} = x(1 - x)(f_C - f_D),$$

124 where  $x$  denotes the frequency of cooperators in the population, while  $f_C$  and  $f_D$  respectively  
 125 denote the average payoffs of cooperators and defectors, which can be calculated as

$$f_C = \sum_{j_C=0}^{N-1} \binom{N-1}{j_C} x^{j_C} (1-x)^{N-j_C} P_C,$$

$$f_D = \sum_{j_C=0}^{N-1} \binom{N-1}{j_C} x^{j_C} (1-x)^{N-j_C} P_D,$$

126 where  $P_C$  and  $P_D$  are shown in Eqs. (1) and (2). After some calculations, the difference between the  
 127 average payoffs of cooperators and defectors can be written as

$$f_C - f_D = \binom{N-1}{M-1} x^{M-1} (1-x)^{N-M} rb - c.$$

128 In the above replicator equation, we describe a game-theoretic interaction involving the risk of  
 129 collective failure, which is a positive constant in previous works (*Santos and Pacheco, 2011; Chen*  
 130 *et al., 2012a*). Here, we are focusing on a dynamical system where there is feedback between  
 131 strategic behaviors and risk. In particular, the impact of strategies on the risk level is channeled  
 132 through a function  $U(x, r)$ , which depends on both key variables. Then by using the general form  
 133 of the feedback, the coevolutionary dynamics can be written as

$$\begin{cases} \epsilon \dot{x} = x(1-x) \left[ \binom{N-1}{M-1} x^{M-1} (1-x)^{N-M} rb - c \right], \\ \dot{r} = U(x, r), \end{cases} \quad (3)$$

134 where  $\epsilon$  denotes the relative speed of strategy update dynamics (*Weitz et al., 2016*), such that  
 135 when  $0 < \epsilon \ll 1$  the strategies evolve significantly faster than the change in the risk level. In the  
 136 following, we consider both linear and nonlinear forms of feedback describing the effect of strategy  
 137 distribution on the evolution of risk.

### 138 **Linear effect of strategy on risk**

139 In the first case, we assume that the effect of strategies on the risk level takes a linear form, which  
 140 is the most common form that can be used to describe the characteristic attributes between key  
 141 variables. Just to illustrate it by a specific example, the probability of influenza infection among  
 142 individuals who have not been vaccinated decreases linearly with the increase of vaccine coverage  
 143 (*Vardavas et al., 2007*). Here we consider that the value of risk decreases linearly with the increase  
 144 of cooperation level. Furthermore, by following the work of Weitz et al. (*Weitz et al., 2016*), we can  
 145 write the dynamical equation of risk as

$$\dot{r} = r(1-r)[u(1-x) - x], \quad (4)$$

146 where  $u(1-x) - x$  denotes the increase of risk by the defection level at rate  $u$  and the decrease  
 147 by the fraction of cooperators at relative rate one. Then the dynamical system is described by the  
 148 following equation

$$\begin{cases} \varepsilon \dot{x} = x(1-x) \left[ \binom{N-1}{M-1} x^{M-1} (1-x)^{N-M} rb - c \right] \\ \dot{r} = r(1-r) [u(1-x) - x]. \end{cases} \quad (5)$$

### 149 Exponential effect of strategy on risk

150 To complete our study we also apply nonlinear form of feedback function. The most plausible  
 151 choice is when the risk level depends exponentially on the population state. To be more specific, we  
 152 consider that the risk will decrease when the frequency of cooperators in the population exceeds  
 153 a certain threshold value  $T$ . Otherwise, the risk level will increase. Such scenario is suitable for  
 154 describing climate change and the spread of infectious diseases, in which the risk can increase  
 155 sharply, such as the occurrence of extreme weather (*Eckstein et al., 2021*) or a sudden outbreak of  
 156 an epidemic in a region (*Yang and Shaman, 2022*). Here, we use the sigmoid function to describe  
 157 the effect of strategy on the risk state (*Boza and Számadó, 2010; Chen et al., 2012b; Couto et al.,*  
 158 *2020*), which can be written as

$$\dot{r} = r(1-r) \left[ \frac{1}{1 + e^{\beta(x-T)}} - \frac{1}{1 + e^{-\beta(x-T)}} \right], \quad (6)$$

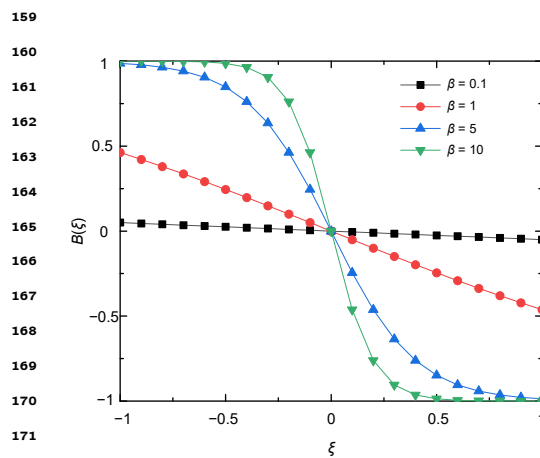

173 **Figure 2.** Feedback equation  $B(\xi)$  varies with  $\xi$  for  
 174 different values of  $\beta$ . The parameter  $\beta$  determines  
 175 the steepness of the curves. When the value of  $\beta$   
 176 is small, the  $B(\xi)$  function is almost constant or  
 177 decays linearly by increasing  $\xi$ . For larger  $\beta$  values,  
 the shape of  $B(\xi)$  approaches a step-like form. In  
 this parameter area the risk level depends  
 sensitively on whether the group cooperation  
 exceeds the threshold  $T$  value or not.

where  $\beta$  characterizes the steepness of the func-  
 tion and  $r(1-r)$  ensures that the risk state re-  
 mains in the  $[0, 1]$  domain. For convenience, we  
 introduce the variable  $\xi = x - T$  and the function  
 $B(\xi) = \frac{1}{1 + e^{\beta\xi}} - \frac{1}{1 + e^{-\beta\xi}}$ . Thus we have  $\dot{r} = r(1-r)B(\xi)$ .  
 When  $\beta = 0$ , we know that  $B(\xi) = 0$ . In this situ-  
 ation, strategies have no effect on the risk level.  
 For  $\beta = +\infty$ , the function  $B(\xi)$  becomes steplike  
 so that the risk will decrease only if the frequency  
 of cooperators in the group exceeds the thresh-  
 old  $T$ . Otherwise, the risk level remains high. To  
 study the consequence of a proper feedback ef-  
 fect we apply a finite  $\beta > 0$  value. In Figure 2 we  
 illustrate how  $B(\xi)$  varies with  $\xi$  for four differ-  
 ent values of  $\beta$ .

Accordingly, the feedback-evolving dynamical  
 system where the effect of strategies on the  
 risk state is expressed by the exponential form  
 can be written as

$$\begin{cases} \varepsilon \dot{x} = x(1-x) \left[ \binom{N-1}{M-1} x^{M-1} (1-x)^{N-M} rb - c \right] \\ \dot{r} = r(1-r) \left[ \frac{1}{1 + e^{\beta(x-T)}} - \frac{1}{1 + e^{-\beta(x-T)}} \right]. \end{cases} \quad (7)$$

178  
 179  
 180  
 181 In the following section, we respectively inves-  
 tigate the coevolutionary dynamics of strategy  
 and risk when considering linear and exponen-  
 tial feedback forms. We note that the details of theoretical analysis can be found in the Appendix.

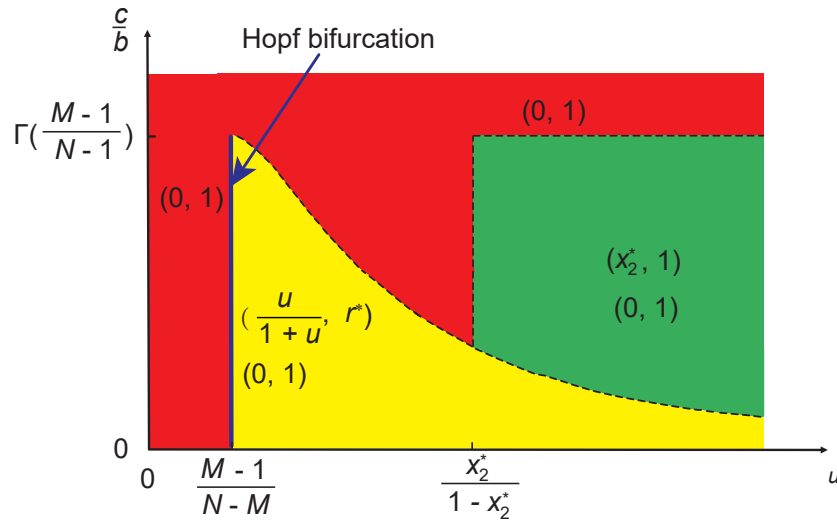

**Figure 3.** Representative plot of stable evolutionary outcomes in System I when linear strategy feedback on risk level is assumed. Different colors are used to distinguish the stability of different equilibrium points in the parameter space  $(u, \frac{c}{b})$ . The blue line indicates that the system undergoes a Hopf bifurcation at  $u = \frac{M-1}{N-M}$ . Here  $x_2^*$  is the real root of the equation  $\Gamma(x) = \frac{c}{b}$  where  $\Gamma(x) = \binom{N-1}{M-1} x^{M-1} (1-x)^{N-M}$ , and  $(\frac{u}{1+u}, r^*)$  is the interior fixed point where  $r^* = \frac{c}{\binom{N-1}{M-1} (\frac{u}{1+u})^{M-1} (\frac{1}{1+u})^{N-M} b}$ . The dashed curve represents that the value of  $\Gamma(\frac{u}{1+u})$  changes with  $u$  when  $u > \frac{M-1}{N-M}$ . The horizontal dashed line represents that  $\Gamma(\frac{M-1}{N-1}) = \frac{c}{b}$  when  $u > \frac{x_2^*}{1-x_2^*}$ . The vertical dashed line represents that  $u = \frac{x_2^*}{1-x_2^*}$  when  $\Gamma(x_2^*) < \frac{c}{b} < \Gamma(\frac{M-1}{N-1})$ .

## 182 Results

### 183 System I: coevolutionary dynamics with linear feedback

184 We first consider the case of linear feedback. More precisely, we assume that the risk value of  
 185 collective failure will decrease linearly with the increase of cooperation and increase linearly with  
 186 the increase of defection level. The resulting dynamical system is presented in Eq. (5). After some  
 187 calculations, we find that this equation system has at most seven fixed points, which are (0,0),  
 188 (0,1), (1,0), (1,1),  $(\frac{u}{1+u}, r^*)$ ,  $(x_1^*, 1)$ , and  $(x_2^*, 1)$ , where  $r^* = \frac{c}{\binom{N-1}{M-1} (\frac{u}{1+u})^{M-1} (\frac{1}{1+u})^{N-M} b}$ ,  $x_1^*$  and  $x_2^*$  are the real  
 189 roots of the equation  $\binom{N-1}{M-1} x^{M-1} (1-x)^{N-M} b = c$ . We further perform theoretical analysis for these  
 190 equilibrium points, as provided in Appendix 1. In order to describe the stable states of System I  
 191 for the complete parameter regions, we present a schematic plot in the parameter space  $(u, \frac{c}{b})$ , as  
 192 shown in Fig. 3. We use different colors to distinguish the evolutionary outcomes for specific pairs  
 193 of key parameters. In the following, we discuss the representative results in detail.

#### 194 System I has an interior equilibrium point.

195 When  $\binom{N-1}{M-1} (\frac{u}{1+u})^{M-1} (\frac{1}{1+u})^{N-M} b > c$ , we know that our coevolutionary system has an interior fixed  
 196 point. According to its stability, we can distinguish three sub-cases here. Namely, when  $u > \frac{M-1}{N-M}$ ,  
 197 then the existing interior fixed point is stable. Besides, since  $\binom{N-1}{M-1} (\frac{M-1}{N-1})^{M-1} (1 - \frac{M-1}{N-1})^{N-M} b > c$ , there  
 198 exist seven fixed points in the system, namely, (0,0), (0,1), (1,0), (1,1),  $(\frac{u}{1+u}, r^*)$ ,  $(x_1^*, 1)$ , and  $(x_2^*, 1)$ . Here  
 199 only (0,1) and  $(\frac{u}{1+u}, r^*)$  are stable (marked by yellow area in Fig. 3). Besides, we provide numerical  
 200 examples to illustrate the above theoretical analysis (see the top row of Fig. 4). We find that bi-  
 201 stable dynamics can appear, that is, depending on the initial conditions the system will evolve to  
 202 one of two stable equilibria: here (0,1) which means high-risk without cooperators, or the interior  
 203 fixed point suggests that cooperation can be maintained at a high level when the value of risk  
 204 exceeds an intermediate value. Furthermore, we note that the results are not affected qualitatively

205 by the feedback speed (see the second column of Fig. 1 in Appendix 1).

206 If the enhancement rate of risk caused by defection drops to a certain threshold, namely  $u =$   
 207  $\frac{M-1}{N-M}$ , a Hopf bifurcation takes place, which is supercritical (marked by blue line in Fig. 3). In this  
 208 situation, System I has all seven fixed points. As analyzed in Appendix 1, only (0, 1) is stable. Fur-  
 209 thermore, we provide numerical examples to illustrate our theoretical analysis (see the second row  
 210 of Fig. 4). We find that the system is bi-stable: depending on the initial fractions of cooperators and  
 211 risk, the system can evolve either to a high-risk state without cooperation or to a limit cycle where  
 212 the frequencies of cooperation and risk show periodic oscillations. In addition, we find that the key  
 213 observations do not change qualitative by increasing the feedback speed (see the second column  
 214 of Fig. 1 of Appendix 1).

215 When the enhancement rate of risk caused by defection is weak and meets  $u < \frac{M-1}{N-M}$  condition,  
 216 then the interior fixed point is unstable. Besides, since  $\binom{N-1}{M-1}(\frac{M-1}{N-1})^{M-1}(1 - \frac{M-1}{N-1})^{N-M}b > c$ , there exist  
 217 all seven fixed points. According to the theoretical analysis presented in Appendix 1, only (0, 1) fixed  
 218 point is stable. In the third row of Fig. 4, we present some representative numerical examples. They  
 219 show that all trajectories in the state space terminate at the fixed point (0, 1), which is consistent  
 220 with our theoretical results. This means that no individual chooses to contribute to the common  
 221 pool, leading to the failure of collective action, and finally, all individuals inevitably lose all their  
 222 endowments.

223 System I has no interior equilibrium point.

224 The alternative case is when there is no interior fixed point, namely,  $\binom{N-1}{M-1}(\frac{u}{1+u})^{M-1}(\frac{1}{1+u})^{N-M}b \leq$   
 225  $c$ . In this situation, when  $\binom{N-1}{M-1}(\frac{M-1}{N-1})^{M-1}(1 - \frac{M-1}{N-1})^{N-M}b > c$ , System I has six fixed points, which  
 226 are (0, 0), (0, 1), (1, 0), (1, 1),  $(x_1^*, 1)$ , and  $(x_2^*, 1)$ , respectively. The theoretical analysis, presented in Ap-  
 227 pendix 1, shows that (0, 0), (1, 0), (1, 1), and  $(x_1^*, 1)$  are unstable, (0, 1) is stable, and  $(x_2^*, 1)$  is stable for  
 228  $x_2^* < \frac{u}{1+u}$  (shown by green area in Fig. 3). In the bottom row of Fig. 4, we provide some numerical ex-  
 229 amples to illustrate our theoretical results. The phase plane dynamics show that most trajectories  
 230 in phase space converge to the stable equilibrium point  $(x_2^*, 1)$ , which suggests that driven by the  
 231 high risk of future loss, most individuals will contribute to the common pool. Besides, the remain-  
 232 ing trajectories in the phase space will converge to the fixed point (0, 1), which means a complete  
 233 failure when all individuals lose all remaining endowments.

234 Furthermore, we prove that the fixed point  $(x_2^*, 1)$  is unstable when  $x_2^* > \frac{u}{1+u}$  in Appendix 1. For  
 235 the special case of  $x_2^* = \frac{u}{1+u}$ , we find that one eigenvalue of the Jacobian matrix at  $(x_2^*, 1)$  is zero and  
 236 the other one is negative. We provide the stability analysis of this fixed point by using the center  
 237 manifold theorem (Khalil, 1996). When  $\binom{N-1}{M-1}(\frac{M-1}{N-1})^{M-1}(1 - \frac{M-1}{N-1})^{N-M}b \leq c$ , (0, 1) is the only stable  
 238 equilibrium point of the System I.

## 239 System II: coevolutionary dynamics with exponential feedback

240 In this section, we consider the case of exponential feedback. Here, there are at most seven equi-  
 241 librium points of the replicator equation (7). Namely,  $(x, y) = (0, 0)$ , (0, 1), (1, 0), (1, 1),  $(x_1^*, 1)$ ,  $(x_2^*, 1)$ ,  
 242 and  $(T, \frac{c}{\binom{N-1}{M-1}T^{M-1}(1-T)^{N-M}b})$ , in which  $x_1^*$  and  $x_2^*$  satisfy the equation  $\binom{N-1}{M-1}x^{M-1}(1-x)^{N-M}b = c$  and  
 243  $x_1^* < \frac{M-1}{N-1} < x_2^*$  (Santos and Pacheco, 2011). For convenience, we set  $\bar{r} = \frac{c}{\binom{N-1}{M-1}T^{M-1}(1-T)^{N-M}b}$ . Here  
 244 the first six equilibria are boundary fixed points, and the last one is an interior fixed point. In  
 245 Appendix 2, we analyze the stability of these equilibria under four different parameter ranges by  
 246 evaluating the sign of the eigenvalues of the Jacobian (Khalil, 1996). The basins of each solution  
 247 in parameter space  $(T, \frac{c}{b})$  are shown in Fig. 5. In the following, we will discuss the evolutionary  
 248 outcomes depending on whether System II has an interior equilibrium point.

249 System II has an interior equilibrium point.

250 In this case  $c < \binom{N-1}{M-1}T^{M-1}(1-T)^{N-M}b$ , there are three typical dynamic behaviors for the evolution  
 251 of cooperation and risk according to the stability conditions of the interior equilibrium point (for  
 252 details, see Appendix 2).

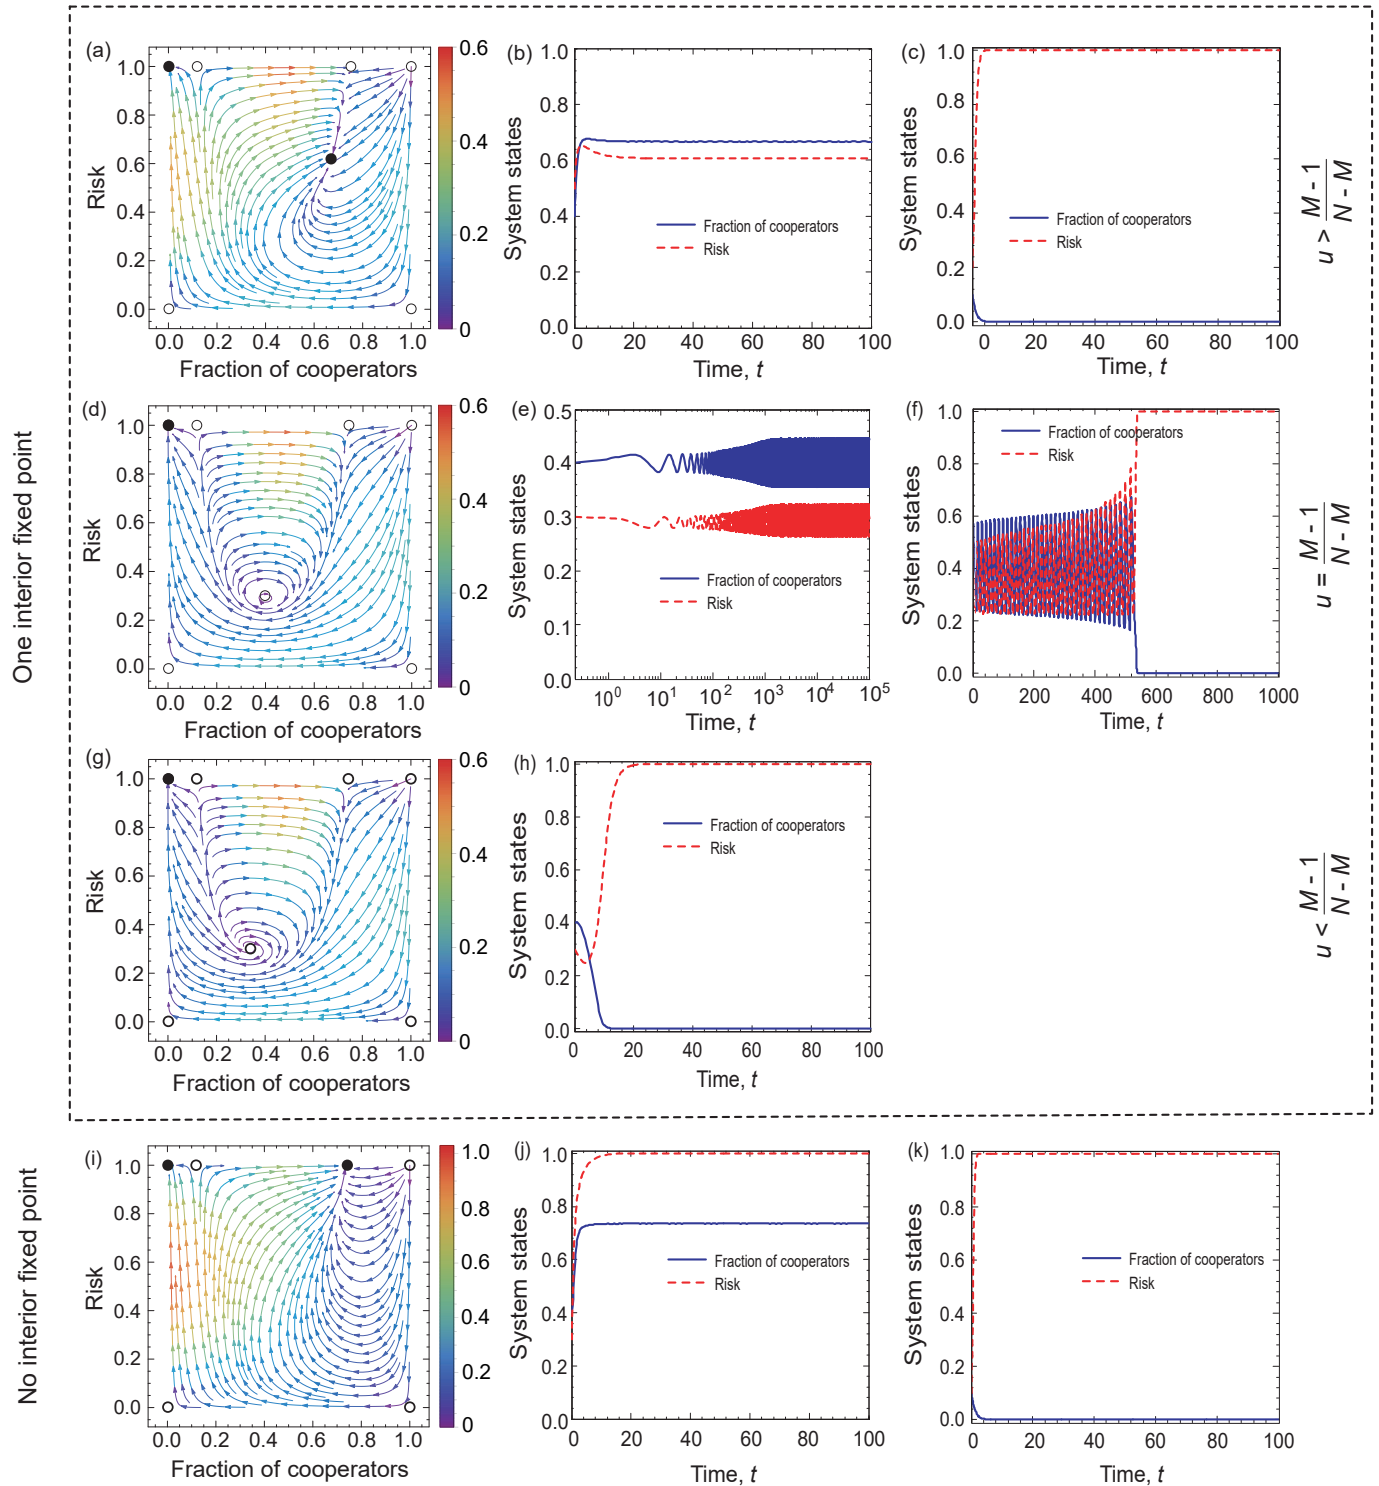

**Figure 4.** Coevolutionary dynamics on phase planes and temporal dynamics of System I when linear feedback is considered. Filled circles represent stable and open circles denote unstable fixed points. The arrows provide the most likely direction of evolution and the continuous color code depicts the speed of convergence in which red denotes the highest speed, while purple represents the lowest speed of transition. On the right-hand side, blue solid line and red dash line respectively denote the fraction of cooperation and the risk level, as indicated in the legend. The first three rows show the coevolutionary dynamics when  $u > \frac{M-1}{N-M}$ ,  $u = \frac{M-1}{N-M}$ , and  $u < \frac{M-1}{N-M}$ , respectively. The bottom row shows coevolutionary dynamics when  $\left(\frac{N-1}{M-1}\right)\left(\frac{u}{1+u}\right)^{M-1}\left(\frac{1}{1+u}\right)^{N-M}b < c$ . Parameters are  $N = 6, c = 0.1, b = 1, u = 2, \varepsilon = 0.1, M = 3$  in panel (a). The initial conditions are  $(x, r) = (0.4, 0.3)$  in panel (b) and  $(x, r) = (0.1, 0.1)$  in panel (c).  $N = 6, c = 0.1, b = 1, u = \frac{2}{3}, \varepsilon = 0.1, M = 3$  in panel (d). The initial conditions are  $(x, r) = (0.4, 0.3)$  in panel (e) and  $(x, r) = (0.4, 0.5)$  in panel (f).  $N = 6, c = 0.1, b = 1, u = 0.5, \varepsilon = 0.1, M = 3$  in panel (g). The initial conditions are  $(x, r) = (0.4, 0.3)$  in panel (h).  $N = 6, c = 0.1, b = 1, u = 4, \varepsilon = 0.1, M = 3$  in panel (i). The initial conditions are  $(x, r) = (0.4, 0.3)$  in panel (j) and  $(x, r) = (0.1, 0.1)$  in panel (k).



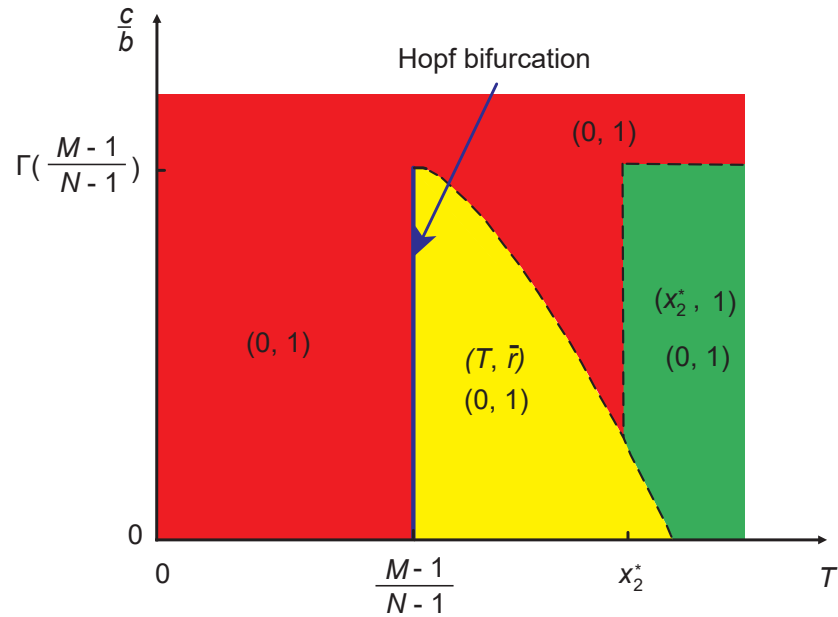

**Figure 5.** A representative diagram about stable solutions of System II when strategy feedback on risk level is exponential. We use different colors to distinguish the stability of equilibrium points in the parameter space  $(T, \frac{c}{b})$ . The blue line indicates that the system undergoes a Hopf bifurcation at  $T = \frac{M-1}{N-1}$ . Here  $(T, \bar{r})$  is the interior fixed point where  $\bar{r} = \frac{c}{\binom{N-1}{M-1} T^{M-1} (1-T)^{N-M} b}$ . The dashed curve represents that the value of  $\Gamma(T)$  changes with  $T$  when  $T > \frac{M-1}{N-1}$ . The horizontal dashed line represents that  $\Gamma(\frac{M-1}{N-1}) = \frac{c}{b}$  when  $T > x_2^*$ . The vertical dashed line represents that  $T = x_2^*$  when  $\Gamma(x_2^*) < \frac{c}{b} < \Gamma(\frac{M-1}{N-1})$ .

253 When  $T > \frac{M-1}{N-1}$ , the interior fixed point is stable. Besides, since  $\binom{N-1}{M-1} (\frac{M-1}{N-1})^{M-1} (1 - \frac{M-1}{N-1})^{N-M} b - c >$   
 254  $0$ , there exist two boundary fixed points, which are  $(x_1^*, 1)$  and  $(x_2^*, 1)$ . Thus the system has seven  
 255 fixed points, which are  $(0, 0)$ ,  $(0, 1)$ ,  $(1, 0)$ ,  $(1, 1)$ ,  $(x_1^*, 1)$ ,  $(x_2^*, 1)$ , and  $(T, \bar{r})$ . From the Jacobian matrices,  
 256 we can conclude that the fixed points  $(0, 0)$ ,  $(0, 1)$ ,  $(1, 0)$ ,  $(1, 1)$ ,  $(x_1^*, 1)$ , and  $(x_2^*, 1)$  are unstable, while  
 257  $(0, 1)$  and  $(T, \bar{r})$  are stable. The latter case is shown in the top row of Fig. 6, where we plot the  
 258 phase plane and temporal dynamics of the system. It suggests that there is a stable interior fixed  
 259 point, and most trajectories in phase space converge to this nontrivial solution. Accordingly, the  
 260 system can evolve into a state where the risk is kept at a low level and almost half of the individuals  
 261 contribute to the common pool. The remaining trajectories in the phase space will converge to the  
 262 alternative destination in which the risk level becomes particularly high and cooperators disappear.  
 263 We note that these qualitative results are robust for different feedback speeds (see the first column  
 264 of Fig. 1 in Appendix 2).

265 When  $T = \frac{M-1}{N-1}$ , the eigenvalues of Jacobian matrix at the interior fixed point are a purely imag-  
 266 inary conjugate pair. Then, according to the Hopf bifurcation theorem (*Kuznetsov et al., 1998*;  
 267 *Guckenheimer and Holmes, 2013*), the system undergoes a Hopf bifurcation at  $T = \frac{M-1}{N-1}$  and a limit  
 268 cycle encircling around interior equilibrium emerges. By calculating the first Lyapunov coefficient,  
 269 we can evaluate that the limit cycle is stable (see Appendix 2). Besides, there exist two boundary  
 270 fixed points,  $(x_1^*, 1)$  and  $(x_2^*, 1)$ , because  $\binom{N-1}{M-1} (\frac{M-1}{N-1})^{M-1} (1 - \frac{M-1}{N-1})^{N-M} b - c > 0$ . Thus the system has all  
 271 seven fixed points. As we discuss in Appendix 2, only the fixed point  $(0, 1)$  is stable. A representa-  
 272 tive numerical example is shown in the second row of Fig. 6, which is conceptually similar to those  
 273 we observed for System I. More precisely, the population either converges toward a limit cycle in  
 274 the interior space, or arrives to the undesired  $(0, 1)$  point where there are no cooperators, but just  
 275 high risk. Last, similar to previous cases, we observe that the feedback speed does not affect the

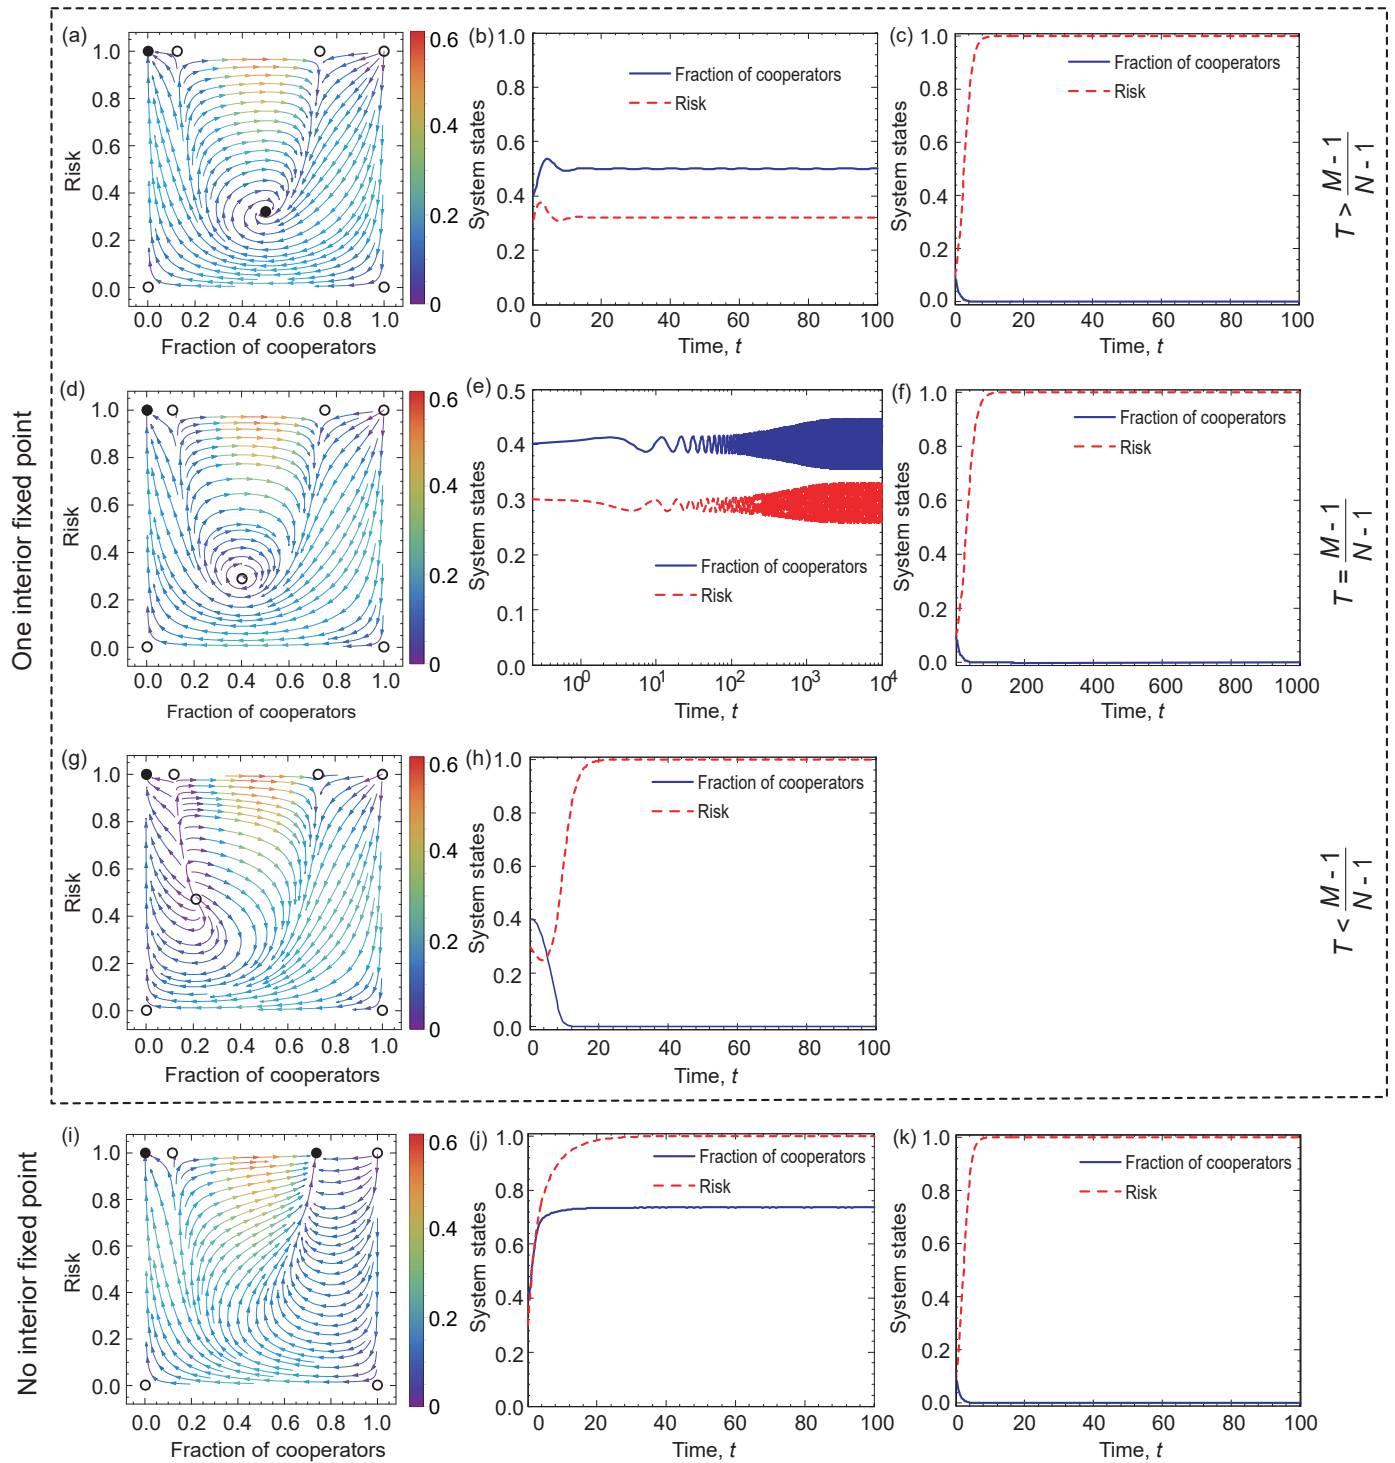

**Figure 6.** Coevolutionary dynamics on phase planes and temporal dynamics of System II when exponential feedback is assumed. Filled circles represent stable and open circles denote unstable fixed points. The arrows provide the most likely direction of evolution and the continuous color code depicts the speed of convergence in which red denotes the highest speed, while purple represents the lowest speed of transition. Blue solid line and red dash line respectively denote the fraction of cooperation and the risk level, as indicated in the legend. The first three rows show the coevolutionary dynamics when  $T > \frac{M-1}{N-1}$ ,  $T = \frac{M-1}{N-1}$ , and  $T < \frac{M-1}{N-1}$ , respectively. The bottom row shows the case when  $c > \binom{N-1}{M-1} T^{M-1} (1-T)^{N-M} b$ . Parameters are  $N = 6, c = 0.1, b = 1, T = 0.5, \beta = 5, \epsilon = 0.1, M = 3$  in panel (a). The initial conditions are  $(x, r) = (0.4, 0.3)$  in panel (b) and  $(x, r) = (0.1, 0.1)$  in panel (c).  $N = 6, c = 0.1, b = 1, T = 0.4, \beta = 5, \epsilon = 0.1, M = 3$  in panel (d). The initial conditions are  $(x, r) = (0.4, 0.3)$  in panel (e) and  $(x, r) = (0.4, 0.5)$  in panel (f).  $N = 6, c = 0.1, b = 1, T = 0.2, \beta = 5, \epsilon = 0.1, M = 3$  in panel (g). The initial conditions are  $(x, r) = (0.4, 0.3)$  in panel (h).  $N = 6, c = 0.1, b = 1, T = 0.8, \epsilon = 0.1, M = 3$  in panel (i). The initial conditions are  $(x, r) = (0.4, 0.3)$  in panel (j) and  $(x, r) = (0.1, 0.1)$  in panel (k).

276 behavior qualitatively, as illustrated in the second column of Fig. 1 of Appendix 2.

277 The interior fixed point is unstable when  $T < \frac{M-1}{N-1}$ . Besides, there are two boundary fixed points,  
278  $(x_1^*, 1)$  and  $(x_2^*, 1)$ , because  $\binom{N-1}{M-1} \left(\frac{M-1}{N-1}\right)^{M-1} \left(1 - \frac{M-1}{N-1}\right)^{N-M} b - c > 0$ . In this situation, the system has all  
279 seven fixed points. Theoretical analysis, presented in Appendix 2, confirms that only  $(0, 1)$  is stable.  
280 This is illustrated in the third row of Fig. 6 where all trajectories terminate in the mentioned point,  
281 signaling that the tragedy of the commons state is inevitable.

282 System II has no interior equilibrium point.

283 When  $c \geq \binom{N-1}{M-1} T^{M-1} (1 - T)^{N-M} b$ , there is no interior fixed point in System II. In this case, when  
284  $\binom{N-1}{M-1} \left(\frac{M-1}{N-1}\right)^{M-1} \left(1 - \frac{M-1}{N-1}\right)^{N-M} b - c < 0$ , there are four equilibrium points, namely,  $(0, 0)$ ,  $(0, 1)$ ,  $(1, 0)$ ,  $(1, 1)$   
285 where  $(0, 1)$  is stable. When  $\binom{N-1}{M-1} \left(\frac{M-1}{N-1}\right)^{M-1} \left(1 - \frac{M-1}{N-1}\right)^{N-M} b - c > 0$ , there exist two boundary fixed  
286 points,  $(x_1^*, 1)$  and  $(x_2^*, 1)$ . Altogether, the system has six fixed points, which are  $(0, 0)$ ,  $(0, 1)$ ,  $(1, 0)$ ,  
287  $(1, 1)$ ,  $(x_1^*, 1)$ , and  $(x_2^*, 1)$ . As we discuss in Appendix 2, the fixed points  $(0, 0)$ ,  $(1, 0)$ ,  $(1, 1)$ ,  $(x_1^*, 1)$  are  
288 unstable, while  $(0, 1)$  is stable. In the special case of  $x_2^* < T$ , the fixed point  $(x_2^*, 1)$  becomes stable.  
289 In this exotic state there is a significant cooperation at a high risk level. A representative numerical  
290 illustration is shown in the bottom row of Fig. 6, signaling the importance of the initial conditions,  
291 because the trajectories converge either to the fixed point  $(0, 1)$  or to  $(x_2^*, 1)$ .

## 292 Discussion

293 Human behavior and the natural environment are inextricably linked. Motivated by this fact, rapidly  
294 growing research efforts have recognized the importance of developing a new comprehensive  
295 framework to study the coupled human-environment ecosystem (*Stern, 1993; Liu et al., 2007;*  
296 *Farahbakhsh et al., 2022*). Starting from the powerful concept of coevolutionary game theory, sev-  
297 eral works focus on depicting the reciprocal interactions and feedback between human behaviors  
298 and natural environment - both the impact of human behaviors on nature and the effects of en-  
299 vironment on human behaviors (*Weitz et al., 2016; Chen and Szolnoki, 2018; Tilman et al., 2020*).  
300 Along this research line, we have developed a feedback-evolving game framework to study the  
301 coevolutionary dynamics of strategies and environment based on collective-risk dilemmas. Here,  
302 the environmental state is no longer a symbol of resource abundance, but depicts the risk level of  
303 collective failure. More precisely, we assume that the frequencies of strategies directly affect the  
304 risk level and reversely, the change of risk state stimulates individual behavioral decision-making.  
305 Importantly, we have explored both linear and highly nonlinear feedback mechanisms which char-  
306 acterize the link between the main system variables.

307 In particular, we have incorporated the strategies-risk feedback mechanism into replicator dy-  
308 namics and explored the possible consequences of coevolutionary dynamics. We have shown that  
309 sustainable cooperation level can be reached in the population in two different ways. First, the  
310 coevolutionary dynamics can converge to a fixed point. This fixed point can be in the interior, in-  
311 dicating that the frequency of cooperators and the level of risk can be respectively stabilized at  
312 a certain level, or at the boundary, indicating high-level cooperation can be maintained even at a  
313 significantly high-risk environment. Second, the system has a stable limit cycle where persistent os-  
314 cillations in strategy and risk state can appear. In addition, we have found that the above described  
315 evolutionary outcomes do not depend significantly on the character of feedback mechanism how  
316 strategy change affects on risk level. No matter it is linear or nonlinear, what really counts is the  
317 existence of the proper feedback. Importantly, we have theoretically identified those conditions  
318 which are responsible for the final dynamical outcomes. Interestingly, it is worth emphasizing that  
319 the relative evolutionary speed of strategy and risk level does not alter the behavior qualitatively,  
320 hence underlines the robustness of our observations.

321 Previous theoretical studies have revealed that the coevolutionary game models describing the  
322 complex interactions between collective actions and environment can produce periodic oscillation  
323 dynamics (*Weitz et al., 2016; Tilman et al., 2020*). Although our feedback-evolving game model

324 can also produce persistent oscillations, there are some differences. In particular, we have the-  
325 oretically proved that Hopf bifurcation can take place and a stable limit cycle can appear in the  
326 system, which is different from the heteroclinic cycle dynamics reported by Weitz et al. (*Weitz*  
327 *et al., 2016*). Besides, we have found that the existence of a limit cycle does not depend on the  
328 speed of coupling, whereas Tilman et al. (*Tilman et al., 2020*) reported the opposite conclusion.  
329 Furthermore, we observe that a small amplitude oscillation is more conducive to maintaining the  
330 stability of the system than a large magnitude oscillation because a higher risk will make it easier  
331 for all individuals to lose all their endowments.

332 The reciprocal feedback process, though many types have not been well characterized, occurs  
333 at all levels of our life (*Liu et al., 2007; Ezenwa et al., 2016; Obradovich and Rahwan, 2019*). Con-  
334 sequently, they may play an indispensable role in maintaining the stability of human society and  
335 the ecosystem. Mathematical modeling based on evolutionary game theory is a powerful tool for  
336 addressing social-ecological and human-environment interactions and analyzing the evolutionary  
337 dynamics of these coupled systems. The mathematical framework proposed in this paper consid-  
338 ers two characteristic forms to describe the effect of strategy on risk, namely, linear and nonlinear  
339 (exponential) forms of feedback. Although these two forms can be equivalent under some limit  
340 conditions, there are essential differences. On one hand, linear relationship is a relatively simple  
341 way to describe the correlation mode of two factors, which is common in real society. For ex-  
342 ample, with the increase of protection awareness and vaccination proportion, the mortality rate  
343 of the epidemic decreased gradually (*Yang and Shaman, 2022*). Furthermore, linear feedback has  
344 been used to describe the interactions between actions of the population and environmental state  
345 (*Weitz et al., 2016; Tilman et al., 2020*). However, linear link cannot fully describe the relationship  
346 between variables in real societies. For example, in recent years, extreme weather phenomena  
347 have occurred more frequently, with greater intensity and wider impact areas. Thus the feedback  
348 between human behaviors and environment may take on a more complex nonlinear form. In this  
349 work, we consider that the strategy of the population has an exponential effect on risk level, and  
350 such form can describe the phenomenon that risk will rise and fall sharply with the change of strat-  
351 egy frequency (Fig. 2). It is worth emphasizing that although we use different forms of feedback  
352 to describe the impact of strategies on risk, the evolutionary dynamics have not changed substan-  
353 tially which highlights the prime importance of the feedback mechanism independently of its actual  
354 form.

355 Our feedback-evolving game model reveals that the coupled strategy and environment system  
356 will produce a variety of representative dynamical behaviors. We find that the undesired equilib-  
357 rium point  $(0, 1)$  in our feedback system is always evolutionarily stable, which does not depend on  
358 whether the effect of strategy on risk is linear or exponential. Such evolutionary outcome means  
359 that all individuals are unwilling to contribute to achieving the collective goal, which leads to the  
360 failure of collective action, and all individuals inevitably lose their remaining endowments. In real-  
361 world scenarios, such as climate change (*Milinski et al., 2008*) and the spread of infectious diseases  
362 (*Cronk and Aktipis, 2021; Chen and Fu, 2022*), once the whole society is in such a state, it is undoubt-  
363 edly disastrous for the public. Therefore, how to adjust and control the system to deviate from this  
364 state is particularly important for policymakers.

365 Finally, it is worth emphasizing that the feedback loop operates over time. In this situation, the  
366 change of risk state or strategy frequency may lead to the change of other factors, such as collective  
367 target, which provides an opportunity for the emergence of new feedback loops. Thus, multiple  
368 types of feedback loops are possible in a single coupled system. Such multiple feedback loops  
369 have been confirmed in the coupling system of animal behavior and disease ecology (*Ezenwa et al.,*  
370 *2016*). Therefore, a promising expansion of our current model could be to consider the multiple  
371 feedback loops.

## 372 Acknowledgments

373 This research was supported by the National Natural Science Foundation of China (Grants Nos.  
374 61976048 and 62036002) and the Fundamental Research Funds of the Central Universities of China.  
375 L.L. acknowledges the support from Special Project of Scientific and Technological Innovation (Grant  
376 Nos. 2452022107 and 2452022012).

## 377 Author contributions

378 Linjie Liu, Conceptualization, Formal analysis, Validation, Investigation, Methodology, Writing - re-  
379 view and editing; Xiaojie Chen, Conceptualization, Formal analysis, Supervision, Writing - review  
380 and editing; Attila Szolnoki, Formal analysis, Writing - review and editing

## 381 Author ORCIDs

382 Linjie Liu <http://orcid.org/0000-0003-0286-8885>  
383 Xiaojie Chen <http://orcid.org/0000-0002-9129-2197>  
384 Attila Szolnoki <http://orcid.org/0000-0002-0907-0406>

## 385 Competing interests

386 The authors declare that no competing interests exist.

## 387 Data Availability Statement

### 388 Code availability

389 The Mathematica (Wolfram Mathematica 11.1) and Matlab (Matlab R2014a) source codes used to  
390 generate Figures 4 and 6 is available at the Dryad (<https://doi.org/10.5061/dryad.wdbrv15rz>).

## 391 References

- 392 Barfuss, W., Donges, J. F., Vasconcelos, V. V., Kurths, J., and Levin, S. A. (2020). Caring for the fu-  
393 ture can turn tragedy into comedy for long-term collective action under risk of collapse. *Proceed-*  
394 *ings of the National Academy of Sciences of the United States of America*, 117(23):12915–12922. DOI:  
395 <https://doi.org/10.1073/pnas.1916545117>
- 396 Boza, G. and Számadó, S. (2010). Beneficial laggards: multilevel selection, cooperative polymorphism  
397 and division of labour in threshold public good games. *BMC Evolutionary Biology*, 10(1):36. DOI:  
398 <https://doi.org/10.1186/1471-2148-10-336>
- 399 Celik, S. (2020). The effects of climate change on human behaviors. In *Environment, Climate, Plant and Aegitation*  
400 *Growth*, pages 577–589. Springer.
- 401 Chen, X. and Fu, F. (2019). Imperfect vaccine and hysteresis. *Proceedings of the Royal Society B: Biological Sciences*,  
402 286(1894):20182406. DOI: <https://doi.org/10.1098/rspb.2018.2406>
- 403 Chen, X. and Fu, F. (2022). Highly coordinated nationwide massive travel restrictions are central to effective  
404 mitigation and control of covid-19 outbreaks in china. *Proceedings of the Royal Society A: Mathematical, Physical*  
405 *and Engineering Sciences*, 478:20220040. DOI: <http://doi.org/10.1098/rspa.2022.0040>
- 406 Chen, X. and Szolnoki, A. (2018). Punishment and inspection for governing the commons in a feedback-evolving  
407 game. *PLoS Computational Biology*, 14(7):e1006347. DOI: <https://doi.org/10.1371/journal.pcbi.1006347>
- 408 Chen, X., Szolnoki, A., and Perc, M. (2012a). Risk-driven migration and the collective-risk social dilemma. *Physical*  
409 *Review E*, 86(3):036101. DOI: <https://doi.org/10.1103/PhysRevE.86.036101>
- 410 Chen, X., Szolnoki, A., Perc, M., and Wang, L. (2012b). Impact of generalized benefit functions on the evolution  
411 of cooperation in spatial public goods games with continuous strategies. *Physical Review E*, 85(6):066133. DOI:  
412 <https://doi.org/10.1103/PhysRevE.85.066133>
- 413 Chica, M., Hernández, J. M., and Santos, F. C. (2022). Cooperation dynamics under pandemic  
414 risks and heterogeneous economic interdependence. *Chaos, Solitons & Fractals*, 155:111655. DOI:  
415 <https://doi.org/10.1016/j.chaos.2021.111655>

- 416 Cooper, G. A., Frost, H., Liu, M., and West, S. A. (2021). The evolution of division of labour in structured and  
417 unstructured groups. *eLife*, 10:e71968. DOI: <https://doi.org/10.7554/eLife.71968>
- 418 Couto, M. C., Pacheco, J. M., and Santos, F. C. (2020). Governance of risky public goods under graduated pun-  
419 ishment. *Journal of Theoretical Biology*, 505:110423. DOI: <https://doi.org/10.1016/j.jtbi.2020.110423>
- 420 Cronk, L. and Aktipis, A. (2021). Design principles for risk-pooling systems. *Nature Human Behaviour*, 5(7):825-  
421 833. DOI: <https://doi.org/10.1038/s41562-021-01121-9>
- 422 Culler, L. E., Ayres, M. P., and Virginia, R. A. (2015). In a warmer arctic, mosquitoes avoid increased mortality  
423 from predators by growing faster. *Proceedings of the Royal Society B: Biological Sciences*, 282(1815):20151549.  
424 DOI: <https://doi.org/10.1098/rspb.2015.1549>
- 425 Domingos, E. F., Grujić, J., Burguillo, J. C., Kirchsteiger, G., Santos, F. C., and Lenaerts, T. (2020). Timing uncer-  
426 tainty in collective risk dilemmas encourages group reciprocity and polarization. *iScience*, 23(12):101752.  
427 DOI: <https://doi.org/10.1016/j.isci.2020.101752>
- 428 Eckstein, D., Künzel, V., and Schäfer, L. (2021). Global climate risk index 2021. *Who Suffers Most from Extreme*  
429 *Weather Events*, pages 2000–2019. [www.germanwatch.org/en/crisis](http://www.germanwatch.org/en/crisis)
- 430 Ezenwa, V. O., Archie, E. A., Craft, M. E., Hawley, D. M., Martin, L. B., Moore, J., and White, L. (2016). Host  
431 behaviour–parasite feedback: an essential link between animal behaviour and disease ecology. *Proceedings*  
432 *of the Royal Society B: Biological Sciences*, 283(1828):20153078. DOI: <https://doi.org/10.1098/rspb.2015.3078>
- 433 Farahbakhsh, I., Bauch, C. T., and Anand, M. (2022). Modelling coupled human–environment complexity for  
434 the future of the biosphere: strengths, gaps and promising directions. *Philosophical Transactions of the Royal*  
435 *Society B: Biological Sciences*, 377(1857):20210382. DOI: <https://doi.org/10.1098/rstb.2021.0382>
- 436 Guckenheimer, J. and Holmes, P. (2013). *Nonlinear Oscillations, Dynamical Systems, and Bifurcations of Vector*  
437 *Fields*, Springer Science & Business Media.
- 438 Han, T. A., Perret, C., and Powers, S. T. (2021). When to (or not to) trust intelligent machines: Insights from an  
439 evolutionary game theory analysis of trust in repeated games. *Cognitive Systems Research*, 68:111–124. DOI:  
440 <https://doi.org/10.1016/j.cogsys.2021.02.003>
- 441 Hauert, C., Saade, C., and McAvoy, A. (2019). Asymmetric evolutionary games with environmental feedback.  
442 *Journal of Theoretical Biology*, 462:347–360. DOI: <https://doi.org/10.1016/j.jtbi.2018.11.019>
- 443 Hilbe, C., Abou Chakra, M., Altrock, P. M., and Traulsen, A. (2013). The evolution of strategic timing in collective-  
444 risk dilemmas. *PLOS ONE*, 8(6):e66490. DOI: <https://doi.org/10.1371/journal.pone.0066490>
- 445 Hilbe, C., Šimsa, Š., Chatterjee, K., and Nowak, M. A. (2018). Evolution of cooperation in stochastic games. *Nature*,  
446 559(7713):246–249. DOI: <https://doi.org/10.1038/s41586-018-0277-x>
- 447 Khalil, H. K. (1996). *Nonlinear Systems*. Prentice Hall.
- 448 Kuznetsov, Y. A., Kuznetsov, I. A., and Kuznetsov, Y. (1998). *Elements of Applied Bifurcation Theory*, Springer.
- 449 Liu, J., Dietz, T., Carpenter, S. R., Alberti, M., Folke, C., Moran, E., Pell, A. N., Deadman, P., Kratz, T., Lubchenco,  
450 J., et al. (2007). Complexity of coupled human and natural systems. *Science*, 317(5844):1513–1516. DOI:  
451 <https://doi.org/10.1126/science.1144004>
- 452 Liu, J., Linderman, M., Ouyang, Z., An, L., Yang, J., and Zhang, H. (2001). Ecological degradation in pro-  
453 tected areas: the case of Wolong nature reserve for giant pandas. *Science*, 292(5514):98–101. DOI:  
454 <https://doi.org/10.1126/science.1058104>
- 455 Maynard Smith, J. (1982). *Evolution and the Theory of Games*. Cambridge University Press.
- 456 Milinski, M., Sommerfeld, R. D., Krambeck, H.-J., Reed, F. A., and Marotzke, J. (2008). The collective-risk social  
457 dilemma and the prevention of simulated dangerous climate change. *Proceedings of the National Academy of*  
458 *Sciences of the United States of America*, 105(7):2291–2294. DOI: <https://doi.org/10.1073/pnas.0709546105>
- 459 Moore, F. C., Lacasse, K., Mach, K. J., Shin, Y. A., Gross, L. J., and Beckage, B. (2022). Determi-  
460 nants of emissions pathways in the coupled climate–social system. *Nature*, 603(7899):103–111. DOI:  
461 <https://doi.org/10.1038/s41586-022-04423-8>

- 462 Nichol, K. L., Wuorenma, J., and Von Sternberg, T. (1998). Benefits of influenza vaccination for low-  
463 , intermediate-, and high-risk senior citizens. *Archives of Internal Medicine*, 158(16):1769–1776. DOI:  
464 <https://doi.org/10.1001/archinte.158.16.1769>
- 465 Niehus, R., Oliveira, N. M., Li, A., Fletcher, A. G., and Foster, K. R. (2021). The evolution of strat-  
466 egy in bacterial warfare via the regulation of bacteriocins and antibiotics. *eLife*, 10:e69756. DOI: DOI:  
467 <https://doi.org/10.7554/eLife.69756>
- 468 Obradovich, N., Migliorini, R., Paulus, M. P., and Rahwan, I. (2018). Empirical evidence of mental health risks  
469 posed by climate change. *Proceedings of the National Academy of Sciences of the United States of America*,  
470 115(43):10953–10958. DOI: <https://doi.org/10.1073/pnas.1801528115>
- 471 Obradovich, N. and Rahwan, I. (2019). Risk of a feedback loop between climatic warming and human mobility.  
472 *Journal of the Royal Society Interface*, 16(158):20190058. DOI: <https://doi.org/10.1098/rsif.2019.0058>
- 473 Pacheco, J. M., Vasconcelos, V. V., and Santos, F. C. (2014). Climate change governance, cooperation and self-  
474 organization. *Physics of Life Reviews*, 11(4):573–586. DOI: <https://doi.org/10.1016/j.plrev.2014.02.003>
- 475 Park, H. J., Pichugin, Y., and Traulsen, A. (2020). Why is cyclic dominance so rare? *eLife*, 9:e57857. DOI:  
476 <https://doi.org/10.7554/eLife.57857>
- 477 Parmesan, C. and Yohe, G. (2003). A globally coherent fingerprint of climate change impacts across natural  
478 systems. *Nature*, 421(6918):37–42. DOI: <https://doi.org/10.1038/nature01286>
- 479 Patz, J. A., Campbell-Lendrum, D., Holloway, T., and Foley, J. A. (2005). Impact of regional climate change on  
480 human health. *Nature*, 438(7066):310–317. DOI: <https://doi.org/10.1038/nature04188>
- 481 Perc, M., Jordan, J. J., Rand, D. G., Wang, Z., Boccaletti, S., and Szolnoki, A. (2017). Statistical physics of human  
482 cooperation. *Physics Reports*, 687: 1-51. DOI: <https://doi.org/10.1016/j.physrep.2017.05.004>
- 483 Radzvilavicius, A. L., Stewart, A. J., and Plotkin, J. B. (2019). Evolution of empathetic moral evaluation. *eLife*,  
484 8:e44269. DOI: <https://doi.org/10.7554/eLife.44269>
- 485 Santos, F. C. and Pacheco, J. M. (2011). Risk of collective failure provides an escape from the tragedy of the  
486 commons. *Proceedings of the National Academy of Sciences of the United States of America*, 108(26):10421–  
487 10425. DOI: <https://doi.org/10.1073/pnas.1015648108>
- 488 Schuster, P. and Sigmund, K. (1983). Replicator dynamics. *Journal of Theoretical Biology*, 100(3):533–538. DOI:  
489 [https://doi.org/10.1016/0022-5193\(83\)90445-9](https://doi.org/10.1016/0022-5193(83)90445-9)
- 490 Schuur, E. A., McGuire, A. D., Schädel, C., Grosse, G., Harden, J. W., Hayes, D. J., Hugelius, G., Koven, C. D., Kuhry,  
491 P., Lawrence, D. M., et al. (2015). Climate change and the permafrost carbon feedback. *Nature*, 520(7546):171–  
492 179. DOI: <https://doi.org/10.1038/nature14338>
- 493 Steffen, W., Sanderson, R. A., Tyson, P. D., Jäger, J., Matson, P. A., Moore III, B., Oldfield, F., Richardson, K.,  
494 Schellnhuber, H.-J., Turner, B. L., et al. (2006). *Global change and the earth system: a planet under pressure*.  
495 Springer Science & Business Media.
- 496 Stern, P. C. (1993). A second environmental science: human-environment interactions. *Science*, 260(5116):1897–  
497 1899. DOI: <https://doi.org/10.1126/science.260.5116.189>
- 498 Stewart, A. J. and Plotkin, J. B. (2014). Collapse of cooperation in evolving games. *Proceed-*  
499 *ings of the National Academy of Sciences of the United States of America*, 111(49):17558–17563. DOI:  
500 <https://doi.org/10.1073/pnas.1408618111>
- 501 Stone, D., Auffhammer, M., Carey, M., Hansen, G., Huggel, C., Cramer, W., Lobell, D., Molau, U., Solow, A., Tibig,  
502 L., et al. (2013). The challenge to detect and attribute effects of climate change on human and natural systems.  
503 *Climatic Change*, 121(2):381–395. DOI: <https://doi.org/10.1007/s10584-013-0873-6>
- 504 Su, Q., McAvoy, A., Mori, Y., and Plotkin, J. B. (2022). Evolution of prosocial behaviours in multilayer populations.  
505 *Nature Human Behaviour*, 6(3):338–348. DOI: <https://doi.org/10.1038/s41562-021-01241-2>
- 506 Su, Q., McAvoy, A., Wang, L., and Nowak, M. A. (2019). Evolutionary dynamics with game transitions. *Pro-*  
507 *ceedings of the National Academy of Sciences of the United States of America*, 116(51):25398–25404. DOI:  
508 <https://doi.org/10.1073/pnas.1908936116>

- 509 Sun, W., Liu, L., Chen, X., Szolnoki, A., and Vasconcelos, V. V. (2021). Combination of insti-  
510 tutional incentives for cooperative governance of risky commons. *iScience*, 24(8):102844. DOI:  
511 <https://doi.org/10.1016/j.isci.2021.102844>
- 512 Szolnoki, A. and Chen, X. (2018). Environmental feedback drives cooperation in spatial social dilemmas. *EPL*,  
513 120(5):58001. DOI: <https://doi.org/10.1209/0295-5075/120/58001>
- 514 Tanimoto, J. (2021). *Sociophysics Approach to Epidemics*. Springer.
- 515 Taylor, P. D. and Jonker, L. B. (1978). Evolutionary stable strategies and game dynamics. *Mathematical Bio-*  
516 *sciences*, 40(1-2):145–156. DOI: [https://doi.org/10.1016/0025-5564\(78\)90077-9](https://doi.org/10.1016/0025-5564(78)90077-9)
- 517 Tilman, A. R., Plotkin, J. B., and Akçay, E. (2020). Evolutionary games with environmental feedbacks. *Nature*  
518 *Communications*, 11:915. DOI: <https://doi.org/10.1038/s41467-020-14531-6>
- 519 Vardavas, R., Breban, R., and Blower, S. (2007). Can influenza epidemics be prevented by voluntary vaccination?  
520 *PLoS Computational Biology*, 3(5):e85. DOI: <https://doi.org/10.1371/journal.pcbi.0030085>
- 521 Vasconcelos, V. V., Santos, F. C., and Pacheco, J. M. (2013). A bottom-up institutional approach  
522 to cooperative governance of risky commons. *Nature Climate Change*, 3(9):797–801. DOI:  
523 <https://doi.org/10.1038/nclimate1927>
- 524 Vasconcelos, V. V., Santos, F. C., Pacheco, J. M., and Levin, S. A. (2014). Climate policies under wealth inequal-  
525 ity. *Proceedings of the National Academy of Sciences of the United States of America*, 111(6):2212–2216. DOI:  
526 <https://doi.org/10.1073/pnas.1323479111>
- 527 Vitousek, P. M., Mooney, H. A., Lubchenco, J., and Melillo, J. M. (1997). Human domination of earth's ecosystems.  
528 *Science*, 277(5325):494–499. DOI: <https://doi.org/10.1126/science.277.5325.494>
- 529 Wang, X. and Fu, F. (2020). Eco-evolutionary dynamics with environmental feedback: Cooperation in a changing  
530 world. *EPL*, 132(1):10001. DOI: <https://doi.org/10.1209/0295-5075/132/10001>
- 531 Weibull, J. W. (1997). *Evolutionary Game Theory*. MIT Press.
- 532 Weitz, J. S., Eksin, C., Paarporn, K., Brown, S. P., and Ratcliff, W. C. (2016). An oscillating tragedy of the commons  
533 in replicator dynamics with game-environment feedback. *Proceedings of the National Academy of Sciences of*  
534 *the United States of America*, 113(47):E7518–E7525. DOI: <https://doi.org/10.1073/pnas.1604096113>
- 535 Yan, F., Chen, X., Qiu, Z., and Szolnoki, A. (2021). Cooperator driven oscillation in a time-delayed feedback-  
536 evolving game. *New Journal of Physics*, 23(5):053017. DOI: <https://doi.org/10.1088/1367-2630/abf205>
- 537 Yang, W. and Shaman, J. (2022). Covid-19 pandemic dynamics in india, the sars-cov-2 delta vari-  
538 ant and implications for vaccination. *Journal of the Royal Society Interface*, 19(191):20210900. DOI:  
539 <https://doi.org/10.1098/rsif.2021.0900>



540 **Appendix 1**

We first study the case where the strategy of the population has a linear effect on the risk level. Then the dynamical system can be written as

541  
542  
543  
544

$$\begin{cases} \epsilon \dot{x} = x(1-x) \left[ \binom{N-1}{M-1} x^{M-1} (1-x)^{N-M} r b - c \right], \\ \dot{r} = r(1-r) [u(1-x) - x]. \end{cases}$$

545 This equation system has at most seven fixed points, which are (0, 0), (0, 1), (1, 0), (1, 1),  
546  $(\frac{u}{1+u}, \frac{c}{\binom{N-1}{M-1} (\frac{u}{1+u})^{M-1} (\frac{1}{1+u})^{N-M} b})$ ,  $(x_1^*, 1)$ , and  $(x_2^*, 1)$ , where  $x_1^*$  and  $x_2^*$  are the real roots of the equation  
547  $\binom{N-1}{M-1} x^{M-1} (1-x)^{N-M} b = c$ . For convenience, we introduce the abbreviation  $r^* = \frac{c}{\binom{N-1}{M-1} (\frac{u}{1+u})^{M-1} (\frac{1}{1+u})^{N-M} b}$   
548 and  $\Gamma(x) = \binom{N-1}{M-1} x^{M-1} (1-x)^{N-M}$ . In the following, we analyze the stability of these equilibrium  
549 points.  
550

551 (1) When  $0 < r^* < 1$ , namely,  $\Gamma(\frac{u}{1+u}) > \frac{c}{b}$ , the system has an interior fixed point. Accord-  
552 ingly, the Jacobian for the interior fixed point is

553  
554  
555

$$J(\frac{u}{1+u}, r^*) = \begin{bmatrix} \bar{a}_{11} & \bar{a}_{12} \\ \bar{a}_{21} & 0 \end{bmatrix},$$

556 where  $\bar{a}_{11} = \frac{c}{\epsilon} [M-1 - \frac{u(N-1)}{u+1}]$ ,  $\bar{a}_{12} = \frac{1}{\epsilon} \binom{N-1}{M-1} (\frac{u}{1+u})^M (\frac{1}{1+u})^{N-M+1} b$ , and  $\bar{a}_{21} = -r^*(1-r^*)(1+u)$ .

557 (i) When  $\bar{a}_{11} > 0$ , namely,  $u < \frac{\epsilon}{M-1}$ , the existing interior fixed point is unstable. Since  
558  $\Gamma(\frac{M-1}{N-1}) > \frac{c}{b}$ , we can know that the two boundary fixed points  $(x_1^*, 1)$  and  $(x_2^*, 1)$  exist. Thus,  
559 the system has seven fixed points in the parameter space, namely, (0, 0), (0, 1), (1, 0), (1, 1),  
560  $(\frac{u}{1+u}, r^*)$ ,  $(x_1^*, 1)$ , and  $(x_2^*, 1)$ . The Jacobian matrices of these equilibrium points are respectively  
561 given as follows.

562 For  $(x, r) = (0, 0)$ , the Jacobian is

563  
564  
565

$$J(0, 0) = \begin{bmatrix} -\frac{c}{\epsilon} & 0 \\ 0 & u \end{bmatrix},$$

566 thus the fixed equilibrium is unstable.

567 For  $(x, r) = (0, 1)$ , the Jacobian is

568  
569  
570

$$J(0, 1) = \begin{bmatrix} -\frac{c}{\epsilon} & 0 \\ 0 & -u \end{bmatrix},$$

571 thus the fixed equilibrium is stable.

572 For  $(x, r) = (1, 0)$ , the Jacobian is

573  
574  
575

$$J(1, 0) = \begin{bmatrix} \frac{c}{\epsilon} & 0 \\ 0 & -1 \end{bmatrix},$$

576 thus the fixed equilibrium is unstable.

577 For  $(x, r) = (1, 1)$ , the Jacobian is

578  
579  
580

$$J(1, 1) = \begin{bmatrix} \frac{c}{\epsilon} & 0 \\ 0 & 1 \end{bmatrix},$$

581 thus the fixed equilibrium is unstable.

For  $(x, r) = (x_1^*, 1)$ , the Jacobian is

$$J(x_1^*, 1) = \begin{bmatrix} \frac{c}{\epsilon} (M-1 - x_1^* (N-1)) & \frac{c}{\epsilon} x_1^* (1-x_1^*) \\ 0 & (1+u)x_1^* - u \end{bmatrix},$$

583

584

585

586

thus the fixed equilibrium is unstable since  $x_1^* < \frac{M-1}{N-1}$ .

For  $(x, r) = (x_2^*, 1)$ , the Jacobian is

587

588

589

590

$$J(x_2^*, 1) = \begin{bmatrix} \frac{c}{\varepsilon}(M-1-x_2^*(N-1)) & \frac{c}{\varepsilon}x_2^*(1-x_2^*) \\ 0 & (1+u)x_2^*-u \end{bmatrix},$$

591

because  $u < \frac{M-1}{N-M}$  and  $x_2^* > \frac{M-1}{N-1}$ , then  $1 - \frac{1}{1+u} < \frac{M-1}{N-1} < x_2^*$ . Thus this fixed equilibrium is unstable.

592

(ii) When  $\bar{a}_{11} = 0$ , namely,  $u = \frac{M-1}{N-M}$ , the trace and determinant of the Jacobian matrix at the interior equilibrium point are respectively given by

$$\text{tr}(J(\frac{u}{1+u}, r^*)) = \bar{a}_{11} = 0,$$

593

594

$$\det(J(\frac{u}{1+u}, r^*)) = -\bar{a}_{12}\bar{a}_{21} = \frac{r^*(1-r^*)(1+u)}{\varepsilon} \binom{N-1}{M-1} (\frac{u}{1+u})^M (\frac{1}{1+u})^{N-M+1} b > 0.$$

595

The eigenvalues of the Jacobian matrix can be calculated

596

597

598

599

600

601

$$\lambda_1 = \frac{\bar{a}_{11} + \sqrt{\bar{a}_{11}^2 + 4\bar{a}_{12}\bar{a}_{21}}}{2} = \bar{\mu} + i\bar{w},$$

$$\lambda_2 = \frac{\bar{a}_{11} - \sqrt{\bar{a}_{11}^2 + 4\bar{a}_{12}\bar{a}_{21}}}{2} = \bar{\mu} - i\bar{w},$$

602

where  $\bar{\mu} = \frac{\bar{a}_{11}}{2} = 0$  and  $\bar{w}^2 = -\bar{a}_{12}\bar{a}_{21}$ .

603

Accordingly, we know that the eigenvalues satisfy the following conditions

604

605

606

607

$$\text{Re}(\lambda) = \bar{\mu} = 0,$$

$$\text{Im}(\lambda) = \frac{\sqrt{-\bar{a}_{11}^2 - 4\bar{a}_{12}\bar{a}_{21}}}{2} \neq 0,$$

$$\frac{d\text{Re}(\lambda)}{du} \Big|_{u=\frac{M-1}{N-M}} = -\frac{c(N-1)}{2\varepsilon(u+1)^2} = -\frac{c(N-M)^2}{2\varepsilon(N-1)} < 0.$$

608

609

610

611

612

613

614

The first two conditions imply that the eigenvalues of Jacobian matrix at  $(\frac{u}{1+u}, r^*)$  has a pair of pure imaginary roots. The third condition means that the pair of complex-conjugate eigenvalues crosses the imaginary axis with nonzero speed. According to Hopf bifurcation theorem ([Kuznetsov et al., 1998](#)), we know that a Hopf bifurcation takes place at  $u = \frac{M-1}{N-M}$ . In order to determine the stability of the existing limit cycle from Hopf bifurcation, we need to calculate the first Lyapunov coefficient. We denote that  $F_1(x, r) = \frac{x(1-x)}{\varepsilon} [\binom{N-1}{M-1} x^{M-1} (1-x)^{N-M} rb - c]$  and  $F_2(x, r) = r(1-r)[u(1-x) - x]$ .

Let  $q, p \in \mathbb{C}^2$  respectively denote the eigenvectors of the Jacobian matrix  $J(T, r^*)$  and its transpose,

$$q = \begin{pmatrix} \frac{-\bar{a}_{12}i}{\bar{w}} \\ 1 \end{pmatrix}, \quad p = \begin{pmatrix} \frac{-i\bar{w}}{\bar{a}_{12}} \\ 1 \end{pmatrix}, \quad (8)$$

which satisfy

$$Jq = i\bar{w}q,$$

$$J^T p = -i\bar{w}p.$$

To achieve the necessary normalization  $\langle p, q \rangle = \bar{p}_1 q_1 + \bar{p}_2 q_2 = 1$ , we can take

$$q = \begin{pmatrix} \frac{-i\bar{a}_{12}}{2i\bar{w}} \\ 1 \\ 2 \end{pmatrix}, \quad p = \begin{pmatrix} \frac{-i\bar{w}}{\bar{a}_{12}} \\ 1 \\ 1 \end{pmatrix}, \quad (9)$$

627

628

629

According to Ref. (**Kuznetsov et al., 1998**), we construct the complex-valued function

630

631

$$G(x, r) = \bar{p}_1 F_1\left(\frac{u}{1+u} + xq_1 + r\bar{q}_1, r^* + xq_2 + r\bar{q}_2\right) + \bar{p}_2 F_2\left(\frac{u}{1+u} + xq_1 + r\bar{q}_1, r^* + xq_2 + r\bar{q}_2\right),$$

632

633

634

635

where  $p, q$  are given above, to evaluate its formal partial derivatives with respect to  $x, r$  at  $(T, r^*)$ , obtaining  $g_{20} = G_{xx}, g_{11} = G_{xrr}$  and  $g_{21} = G_{xxr}$ . After some calculations, we can get the first Lyapunov coefficient

636

637

$$l_1 = \frac{1}{2\bar{\omega}^2} \text{Re}(ig_{20}g_{11} + \bar{\omega}g_{21}).$$

638

639

640

641

642

643

644

Specifically, when  $l_1 < 0$ , a unique and stable limit cycle bifurcates from the equilibrium appears, while when  $l_1 > 0$ , the Hopf bifurcation is subcritical such that an unstable limit cycle will be generated. Due to the complexity of the system, it is difficult to conduct bifurcation analysis collectively. Here we conduct a numerical analysis to investigate the stability of the existing limit cycle when the model parameters are consistent with Fig. 4(d). By using the algorithm in Ref. (**Kuznetsov et al., 1998**), we can get  $l_1 = -1.407166124 \times 10^{-8} < 0$ , which implies that the Hopf bifurcation is supercritical.

645

646

647

648

Besides, since  $\Gamma(\frac{M-1}{N-1}) > \frac{c}{b}$ , we can state that the two boundary fixed points  $(x_1^*, 1)$  and  $(x_2^*, 1)$  exist. Thus the system has seven equilibrium points, which are  $(0, 0)$ ,  $(0, 1)$ ,  $(1, 0)$ ,  $(1, 1)$ ,  $(\frac{u}{1+u}, r^*)$ ,  $(x_1^*, 1)$ , and  $(x_2^*, 1)$ , respectively. Accordingly to the sign of the eigenvalues of the Jacobian matrices, we know that only  $(0, 1)$  is stable.

649

650

651

652

653

(iii) When  $\bar{a}_{11} < 0$ , namely,  $u > \frac{M-1}{N-M}$ , the trace and determinant of the Jacobian matrix at the interior equilibrium point are respectively given by

654

655

656

657

$$\text{tr}(J(\frac{u}{1+u}, r^*)) = \bar{a}_{11} < 0,$$

$$\det(J(\frac{u}{1+u}, r^*)) = -\bar{a}_{12}\bar{a}_{21} = \frac{r^*(1-r^*)(1+u)}{\epsilon} \left(\frac{N-1}{M-1}\right) \left(\frac{u}{1+u}\right)^M \left(\frac{1}{1+u}\right)^{N-M+1} b > 0.$$

658

659

660

661

662

Thus the interior fixed point is stable. Besides, since  $\Gamma(\frac{M-1}{N-1}) > \frac{c}{b}$ , two boundary fixed points,  $(x_1^*, 1)$  and  $(x_2^*, 1)$ , exist. Thus there are seven fixed points in the system, which are  $(0, 0)$ ,  $(0, 1)$ ,  $(1, 0)$ ,  $(1, 1)$ ,  $(\frac{u}{1+u}, r^*)$ ,  $(x_1^*, 1)$ , and  $(x_2^*, 1)$ , respectively. Here, the fixed points  $(0, 1)$  and  $(\frac{u}{1+u}, r^*)$  are stable, while others are unstable.

663

664

665

666

667

(2) When  $r^* \geq 1$ , namely,  $\Gamma(\frac{u}{1+u}) \leq \frac{c}{b}$ , the system has no interior equilibrium point. In this case, when  $\Gamma(\frac{M-1}{N-1}) > \frac{c}{b}$ , the system has six fixed points, which are  $(0, 0)$ ,  $(0, 1)$ ,  $(1, 0)$ ,  $(1, 1)$ ,  $(x_1^*, 1)$ , and  $(x_2^*, 1)$ , respectively. According to the sign of the largest eigenvalues of the Jacobian matrices, we can say that  $(0, 0)$ ,  $(1, 0)$ ,  $(1, 1)$ ,  $(x_1^*, 1)$  are unstable, while  $(0, 1)$  is stable. Particularly, when  $x_2^* < \frac{u}{1+u}$ , the fixed point  $(x_2^*, 1)$  is stable, and it is unstable when  $x_2^* > \frac{u}{1+u}$ . When  $x_2^* = \frac{u}{1+u}$ , we know that one eigenvalue of the Jacobian matrix is zero and the other eigenvalue is negative. Then we study its stability by using the center manifold theorem (**Khalil, 1996**). For the fixed point  $(x_2^*, 1)$ , the Jacobian matrix can be written as

$$J(x_2^*, 1) = \begin{bmatrix} \gamma_{11} & \gamma_{12} \\ 0 & 0 \end{bmatrix},$$

where  $\gamma_{11} = \frac{c}{\epsilon}(M-1-x_2^*(N-1))$  and  $\gamma_{12} = \frac{c}{\epsilon}x_2^*(1-x_2^*)$ . To do that, we take  $z_1 = x - x_2^*$  and  $z_2 = r - 1$ , then the system can be rewritten as

$$\begin{cases} \dot{z}_1 = \frac{1}{\epsilon}(x_2^* + z_1)(1 - x_2^* - z_1) \left[ \left(\frac{N-1}{M-1}\right) (x_2^* + z_1)^{M-1} (1 - x_2^* - z_1)^{N-M} (z_2 + 1)b - c \right], \\ \dot{z}_2 = (z_2 + 1)(-z_2)[u(1 - x_2^* - z_1) - x_2^* - z_1]. \end{cases}$$

670  
671  
672  
673  
674  
675  
676  
677  
678  
679  
680  
681  
682  
683  
684  
685  
686  
687  
688  
689  
690  
691  
692  
693  
694  
695  
696  
697

Let  $Q$  be a matrix whose columns are the eigenvectors of  $J(x_2^*, 1)$ , which can be written as

$$Q = \begin{bmatrix} 1 & -\frac{\gamma_{12}}{\gamma_{11}} \\ 0 & 1 \end{bmatrix}.$$

Then we have

$$Q^{-1}JQ = \begin{bmatrix} \gamma_{11} & 0 \\ 0 & 0 \end{bmatrix}.$$

We further take  $[\eta_1 \ \eta_2]^T = Q^{-1}[z_1 \ z_2]$ , and then we have  $\eta_1 = z_1 + \frac{\gamma_{12}}{\gamma_{11}}z_2$  and  $\eta_2 = z_2$ . It leads to

$$\dot{\eta}_2 = -\eta_2(\eta_2 + 1)\left[u\left(1 - \frac{u}{1+u} - \eta_1 + \frac{\gamma_{12}}{\gamma_{11}}\eta_2\right) - \frac{u}{1+u} - \eta_1 + \frac{\gamma_{12}}{\gamma_{11}}\eta_2\right].$$

According to the center manifold theorem, we know that  $\eta_1 = h(\eta_2)$  is a center manifold. Then we start to try  $h(\eta_2) = O(|\eta_2|^2)$ , which yields the reduced system

$$\dot{\eta}_2 = -(1+u)\frac{\gamma_{12}}{\gamma_{11}}\eta_2^2 - (1+u)\frac{\gamma_{12}}{\gamma_{11}}\eta_2^3 + O(|\eta_2|^4).$$

Since  $-(1+u)\frac{\gamma_{12}}{\gamma_{11}} \neq 0$ , the fixed point  $\eta_2 = 0$  of the reduced system is unstable. Accordingly, the fixed point  $(x_2^*, 1)$  of the original system is unstable.

When  $\Gamma\left(\frac{M-1}{N-1}\right) = \frac{c}{b}$ , the system has five fixed points, which are  $(0, 0)$ ,  $(0, 1)$ ,  $(1, 0)$ ,  $(1, 1)$ , and  $\left(\frac{M-1}{N-1}, 1\right)$ , respectively. According to the sign of the eigenvalues in the Jacobian matrices, we can state that only  $(0, 1)$  is stable. When  $\Gamma\left(\frac{M-1}{N-1}\right) < \frac{c}{b}$ , the system has four fixed points, namely  $(0, 0)$ ,  $(0, 1)$ ,  $(1, 0)$ , and  $(1, 1)$ . Here only  $(0, 1)$  is stable.

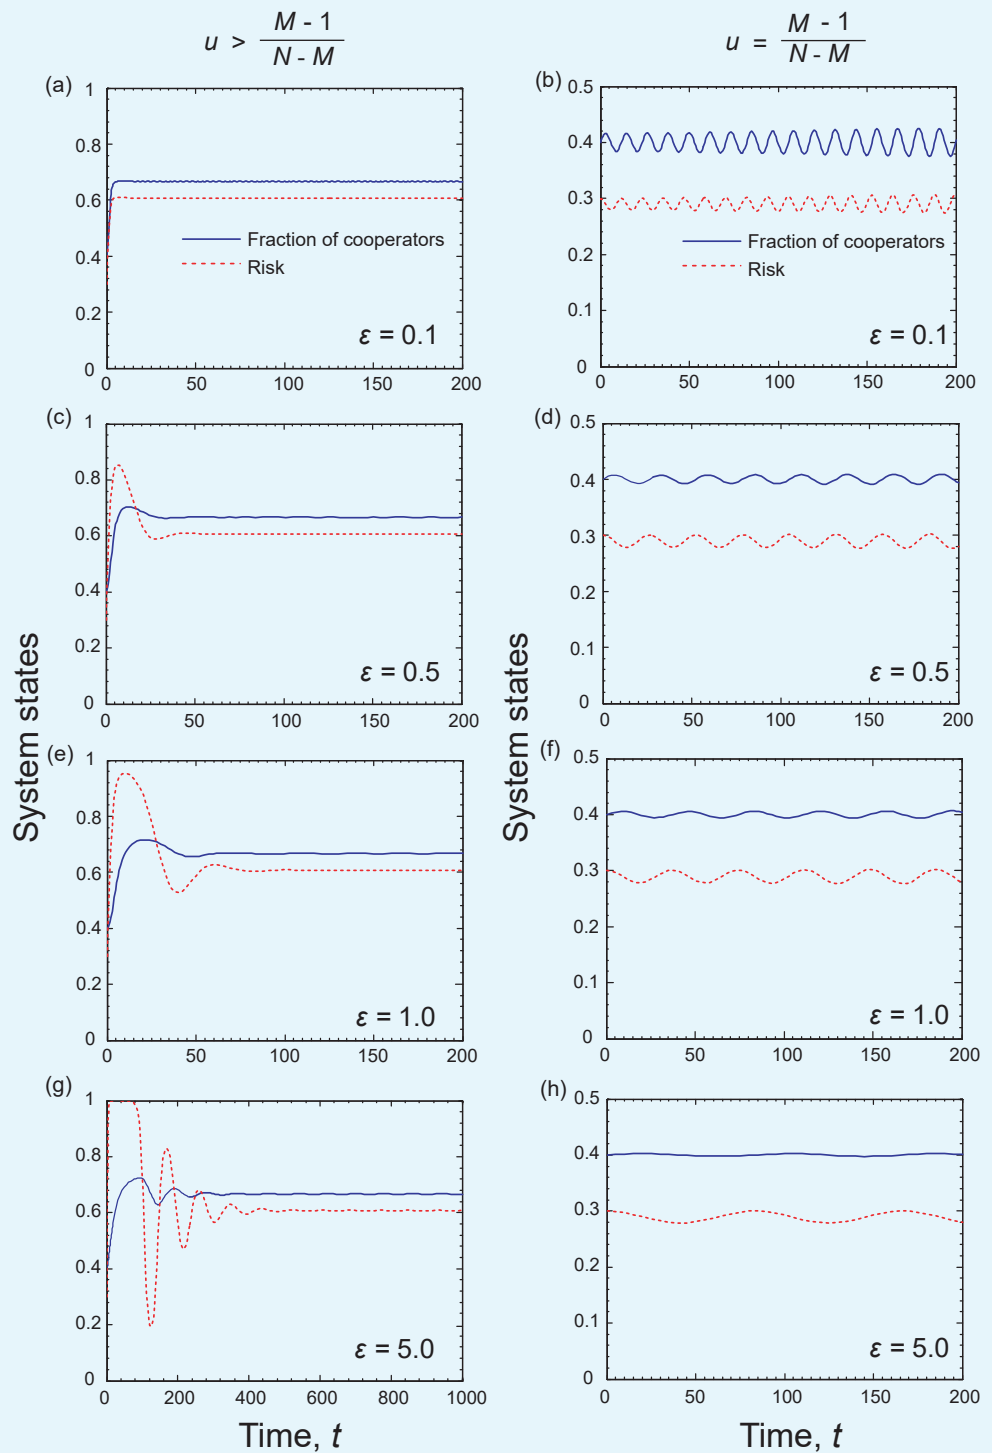

698  
699  
700  
702

**Appendix 1 Figure 1.** Coevolutionary dynamics of System I for different  $\epsilon$  values when linear feedback effect of strategy on risk level is considered. Parameters are  $N = 6$ ,  $c = 0.1$ ,  $b = 1$ , and  $M = 3$ .  $u = 2$  in left column and  $u = 2/3$  in right column. The initial conditions are  $(x, r) = (0.4, 0.3)$ .

703 **Appendix 2**

System II with exponential feedback is described by

$$\begin{cases} \varepsilon \dot{x} = x(1-x) \left[ \binom{N-1}{M-1} x^{M-1} (1-x)^{N-M} r b - c \right], \\ \dot{r} = r(1-r) \left[ \frac{1}{1+e^{\beta(x-T)}} - \frac{1}{1+e^{-\beta(x-T)}} \right]. \end{cases}$$

where the parameter  $\beta > 0$  represents the steepness of the function.

This equation system has at most seven fixed points, which are  $(0, 0)$ ,  $(0, 1)$ ,  $(1, 0)$ ,  $(1, 1)$ ,  $(T, \frac{c}{\binom{N-1}{M-1} T^{M-1} (1-T)^{N-M} b})$ ,  $(x_1^*, 1)$ , and  $(x_2^*, 1)$ , where  $x_1^*$  and  $x_2^*$  are the real roots of the equation  $\binom{N-1}{M-1} x^{M-1} (1-x)^{N-M} b = c$  and  $x_1^* < \frac{M-1}{N-1} < x_2^*$ . For simplicity, we introduce the abbreviation  $\bar{r} = \frac{c}{\binom{N-1}{M-1} T^{M-1} (1-T)^{N-M} b}$  and  $\Gamma(x) = \binom{N-1}{M-1} x^{M-1} (1-x)^{N-M}$ . In the following, we study the stabilities of equilibria based on whether the system has an interior equilibrium point.

(1) When  $0 < \bar{r} < 1$ , namely,  $\Gamma(T) > \frac{c}{b}$ , System II has an interior equilibrium point.

The Jacobian matrix evaluated at this equilibrium is

$$J(T, \bar{r}) = \begin{bmatrix} a_{11} & a_{12} \\ a_{21} & 0 \end{bmatrix},$$

where  $a_{11} = \frac{c}{\varepsilon} (M-1 - T(N-1))$ ,  $a_{12} = \frac{1}{\varepsilon} \binom{N-1}{M-1} T^M (1-T)^{N-M+1} b$ , and  $a_{21} = -\frac{\bar{r}(1-\bar{r})\beta}{2}$ . Notice that  $\frac{1}{\varepsilon} \binom{N-1}{M-1} T^M (1-T)^{N-M+1} b > 0$  and  $-\frac{\bar{r}(1-\bar{r})\beta}{2} < 0$ , then the trace and determinant of the Jacobian matrix are respectively given by

$$\begin{aligned} \text{tr}(J(T, \bar{r})) &= \frac{c}{\varepsilon} (M-1 - T(N-1)), \\ \det(J(T, \bar{r})) &= \frac{1}{\varepsilon} \binom{N-1}{M-1} T^M (1-T)^{N-M+1} b \frac{\bar{r}(1-\bar{r})\beta}{2} > 0. \end{aligned}$$

The eigenvalues of the Jacobian matrix can be calculated

$$\begin{aligned} \lambda_1 &= \frac{a_{11} + \sqrt{a_{11}^2 + 4a_{12}a_{21}}}{2}, \\ \lambda_2 &= \frac{a_{11} - \sqrt{a_{11}^2 + 4a_{12}a_{21}}}{2}. \end{aligned}$$

Here we set that  $\mu(T) = \frac{a_{11}}{2}$ ,  $w^2(T) = -\frac{a_{11}^2 + 4a_{12}a_{21}}{4}$ , and  $T_0 = \frac{M-1}{N-1}$ .

(i) When  $a_{11} > 0$ , namely,  $T < T_0$ , the interior equilibrium point is unstable. Since  $\Gamma(T_0) > \frac{c}{b}$ , we can know that the two boundary fixed points  $(x_1^*, 1)$  and  $(x_2^*, 1)$  exist. Thus, the system has seven fixed points in the parameter space, namely,  $(0, 0)$ ,  $(0, 1)$ ,  $(1, 0)$ ,  $(1, 1)$ ,  $(T, \bar{r})$ ,  $(x_1^*, 1)$ , and  $(x_2^*, 1)$ .

For  $(x, r) = (0, 0)$ , the Jacobian is

$$J(0, 0) = \begin{bmatrix} -\frac{c}{\varepsilon} & 0 \\ 0 & \frac{1-e^{-\beta T}}{1+e^{-\beta T}} \end{bmatrix},$$

thus the fixed equilibrium is unstable.

For  $(x, r) = (0, 1)$ , the Jacobian is

$$J(0, 1) = \begin{bmatrix} -\frac{c}{\varepsilon} & 0 \\ 0 & -\frac{1-e^{-\beta T}}{1+e^{-\beta T}} \end{bmatrix},$$

742

743

744

745

thus the equilibrium point is stable.

746

For  $(x, r) = (1, 0)$ , the Jacobian is

747

748

749

$$J(1, 0) = \begin{bmatrix} \frac{c}{\varepsilon} & 0 \\ 0 & \frac{1-e^{\beta(1-T)}}{1+e^{\beta(1-T)}} \end{bmatrix},$$

750

thus the fixed point is unstable.

751

For  $(x, r) = (1, 1)$ , the Jacobian is

752

753

754

$$J(1, 1) = \begin{bmatrix} \frac{c}{\varepsilon} & 0 \\ 0 & -\frac{1-e^{\beta(1-T)}}{1+e^{\beta(1-T)}} \end{bmatrix},$$

755

thus the fixed equilibrium is unstable.

756

For  $(x, r) = (x_1^*, 1)$ , the Jacobian is

757

758

759

$$J(x_1^*, 1) = \begin{bmatrix} \frac{c}{\varepsilon}(M-1-x_1^*(N-1)) & \frac{c}{\varepsilon}x_1^*(1-x_1^*) \\ 0 & -\frac{1-e^{\beta(x_1^*-T)}}{1+e^{\beta(x_1^*-T)}} \end{bmatrix},$$

760

thus the fixed equilibrium is unstable since  $x_1^* < T_0$ .

761

For  $(x, r) = (x_2^*, 1)$ , the Jacobian is

762

763

764

$$J(x_2^*, 1) = \begin{bmatrix} \frac{c}{\varepsilon}(M-1-x_2^*(N-1)) & \frac{c}{\varepsilon}x_2^*(1-x_2^*) \\ 0 & -\frac{1-e^{\beta(x_2^*-T)}}{1+e^{\beta(x_2^*-T)}} \end{bmatrix},$$

765

thus the fixed equilibrium is unstable since  $T < T_0 < x_2^*$ .

766

767

768

769

770

771

772

773

774

775

(ii) When  $a_{11} = 0$ , namely,  $T = T_0 = \frac{M-1}{N-1}$ , we have  $\mu(T_0) = 0$ . Moreover,  $w^2(T) = -\frac{a_{11}^2+4a_{12}a_{21}}{4} = \frac{1}{\varepsilon} \binom{N-1}{M-1} T^M (1-T)^{N-M+1} b^{\bar{r}(1-\bar{r})\beta} > 0$ . Therefore, the eigenvalues of the Jacobian matrix are a purely imaginary conjugate pair  $\lambda_{1,2}(T_0) = \pm iw(T_0)$ . Considering that  $\frac{\partial \mu(T)}{\partial T} \Big|_{T_0} = -\frac{c(N-1)}{2\varepsilon} < 0$ , then we know that the system undergoes a Hopf bifurcation at  $T = T_0$  and there exists a limit cycle around the interior equilibrium. Accordingly, we can evaluate the direction of the limit cycle bifurcation by computing the first Lyapunov coefficient  $l_1$  of the system. Here we also conduct numerical calculations to investigate the stability of the existing limit cycle when the model parameters are consistent with Fig. 6(d). By using the algorithm in Ref. ([Kuznetsov et al., 1998](#)), we can get  $l_1 = -1.876221498 \times 10^{-8}$ , which implies that the Hopf bifurcation is supercritical.

776

777

778

779

780

781

782

Besides, since  $\Gamma(T_0) > \frac{c}{b}$ , we know that there are seven equilibrium points in System II. They are  $(0, 0)$ ,  $(0, 1)$ ,  $(1, 0)$ ,  $(1, 1)$ ,  $(T, \bar{r})$ ,  $(x_1^*, 1)$ , and  $(x_2^*, 1)$ . According to the sign of the eigenvalues of the Jacobian matrices, only  $(0, 1)$  is stable.

783

784

785

786

787

788

789

790

791

(iii) When  $a_{11} < 0$ , namely,  $T > T_0$ , the interior equilibrium point is stable. Besides, since  $\Gamma(T_0) > \frac{c}{b}$ , we find that there are seven fixed points in the system, which are  $(0, 0)$ ,  $(0, 1)$ ,  $(1, 0)$ ,  $(1, 1)$ ,  $(T, \bar{r})$ ,  $(x_1^*, 1)$ , and  $(x_2^*, 1)$ , respectively. Here, the fixed points  $(0, 1)$  and  $(T, \bar{r})$  are stable, while others are unstable.

(2) When  $\bar{r} \geq 1$ , namely,  $\Gamma(T) \leq \frac{c}{b}$ , System II has no interior equilibrium point. In this case, when  $\Gamma(T_0) > \frac{c}{b}$ , the system has six fixed points, which are  $(0, 0)$ ,  $(0, 1)$ ,  $(1, 0)$ ,  $(1, 1)$ ,  $(x_1^*, 1)$ , and  $(x_2^*, 1)$ , respectively. According to the sign of the largest eigenvalues of the Jacobian matrices, we can say that  $(0, 0)$ ,  $(1, 0)$ ,  $(1, 1)$ ,  $(x_1^*, 1)$  are unstable, while  $(0, 1)$  is stable. Particularly, when  $x_2^* < T$ , the fixed point  $(x_2^*, 1)$  is stable, and it is unstable when  $x_2^* > T$ . When  $\Gamma(T_0) = \frac{c}{b}$ , the system has five fixed points, which are  $(0, 0)$ ,  $(0, 1)$ ,  $(1, 0)$ ,  $(1, 1)$ , and  $(T_0, 1)$ , respectively. According to the sign of the eigenvalues in the Jacobian matrices, we can see that only  $(0, 1)$  is stable. When  $\Gamma(T_0) < \frac{c}{b}$ , the system has four fixed points, namely  $(0, 0)$ ,  $(0, 1)$ ,  $(1, 0)$ , and  $(1, 1)$ . Here only  $(0, 1)$  is stable.

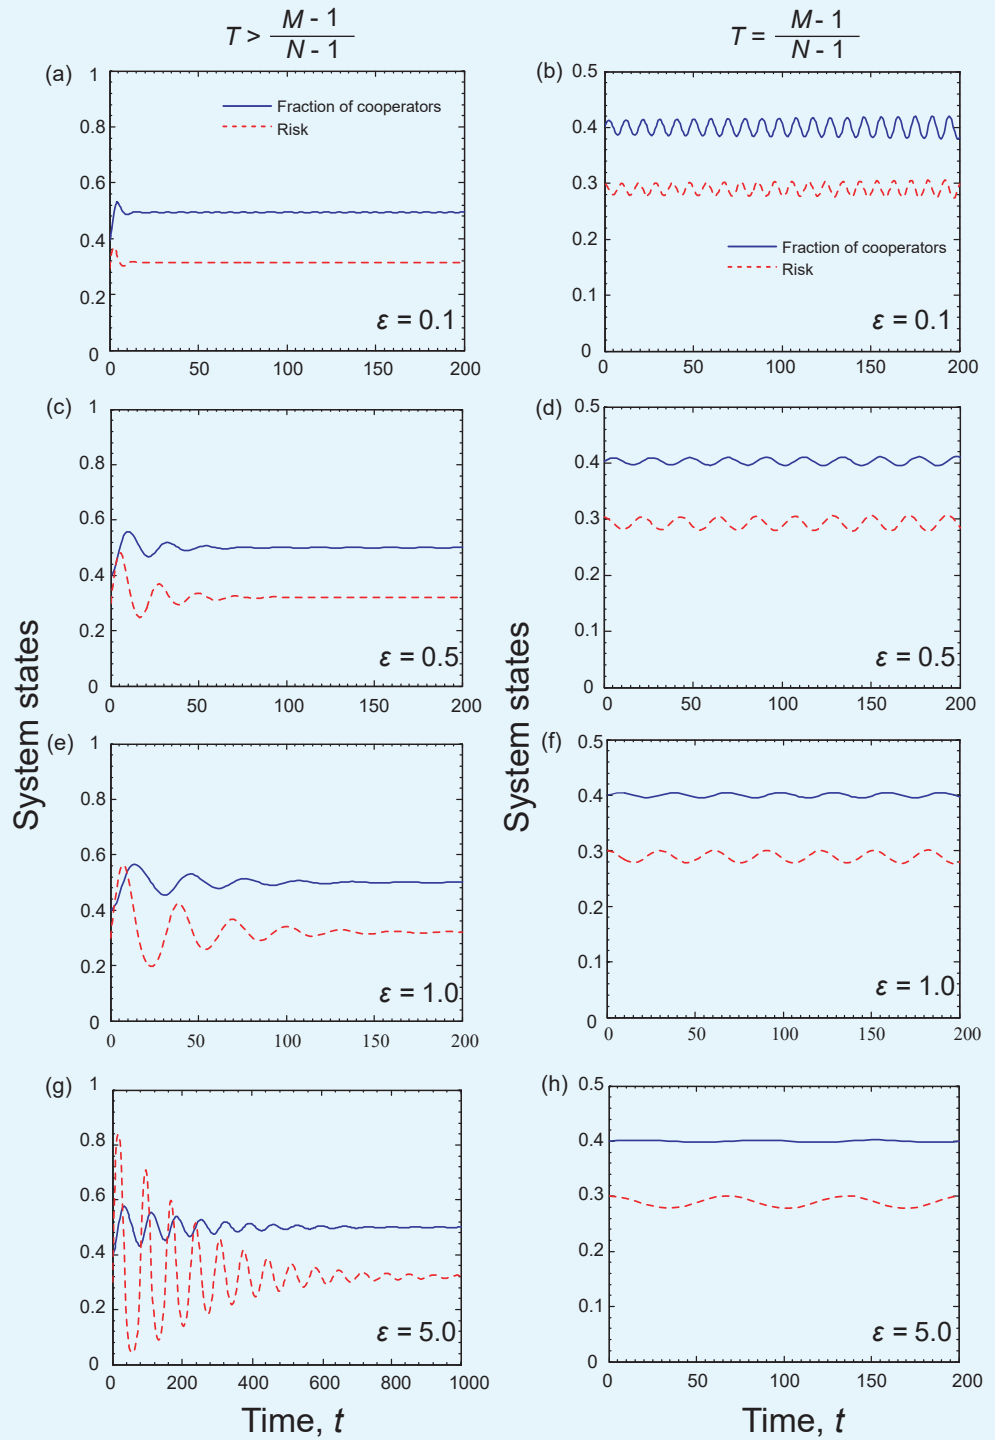

792

793

794

796

**Appendix 2 Figure 1.** Coevolutionary dynamics of System II for different  $\epsilon$  values when the strategy feedback on risk is exponential. Parameters are  $N = 6$ ,  $c = 0.1$ ,  $b = 1$ ,  $\beta = 5$ , and  $M = 3$ .  $T = 0.5$  in the left column and  $T = 0.4$  in the right column. The initial condition is  $(x, r) = (0.4, 0.3)$ .



 defectors

 cooperators

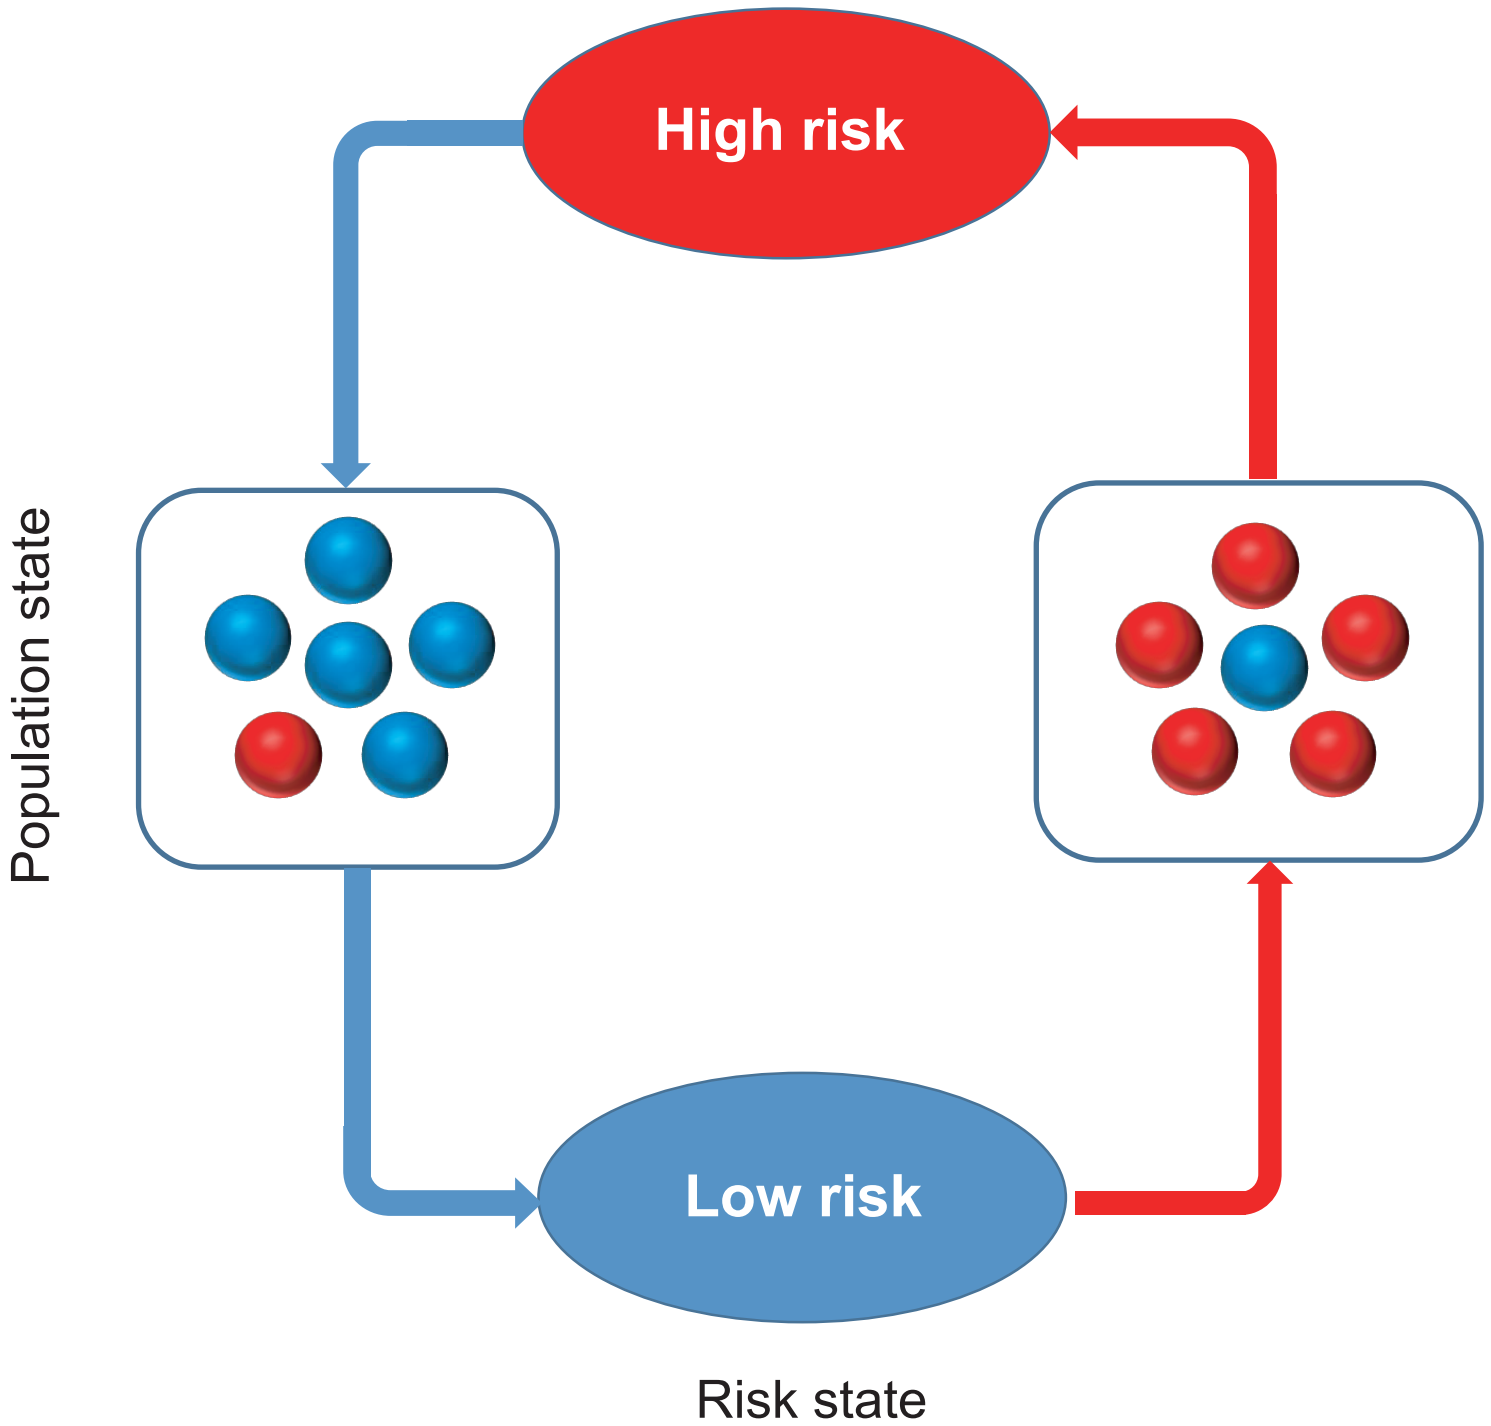

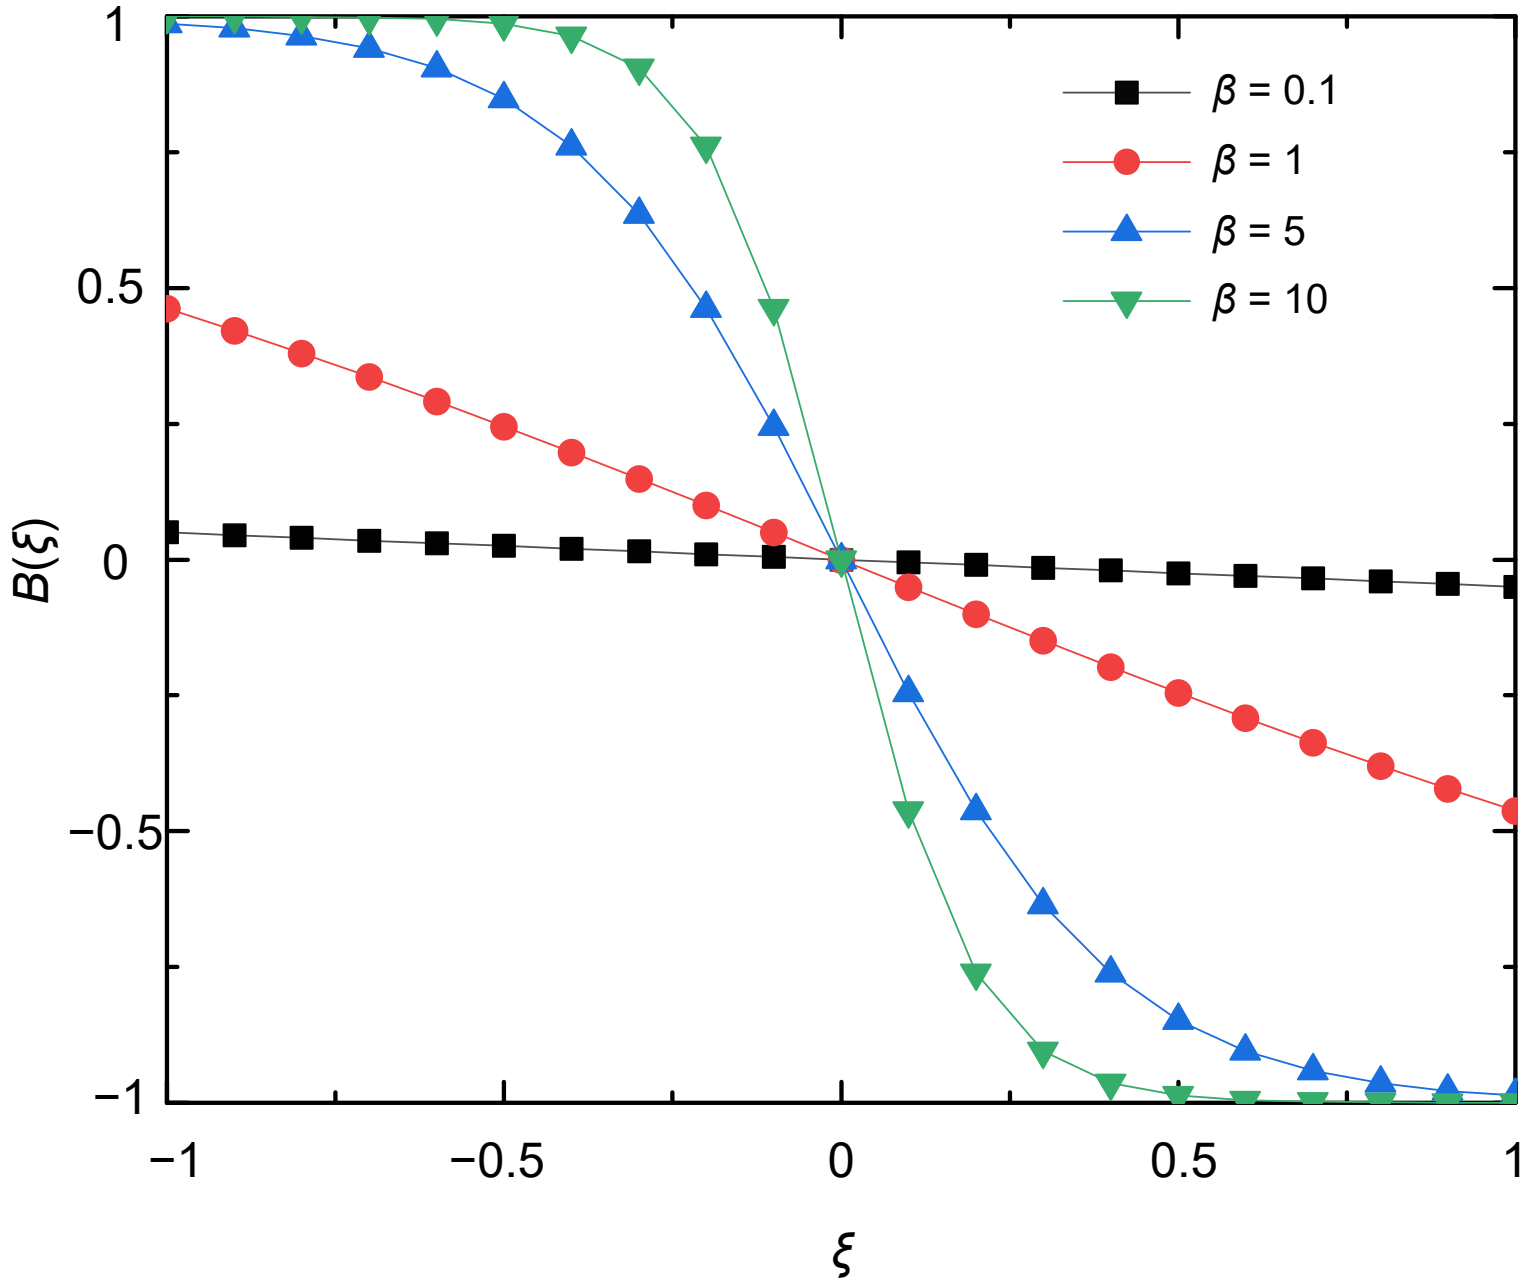

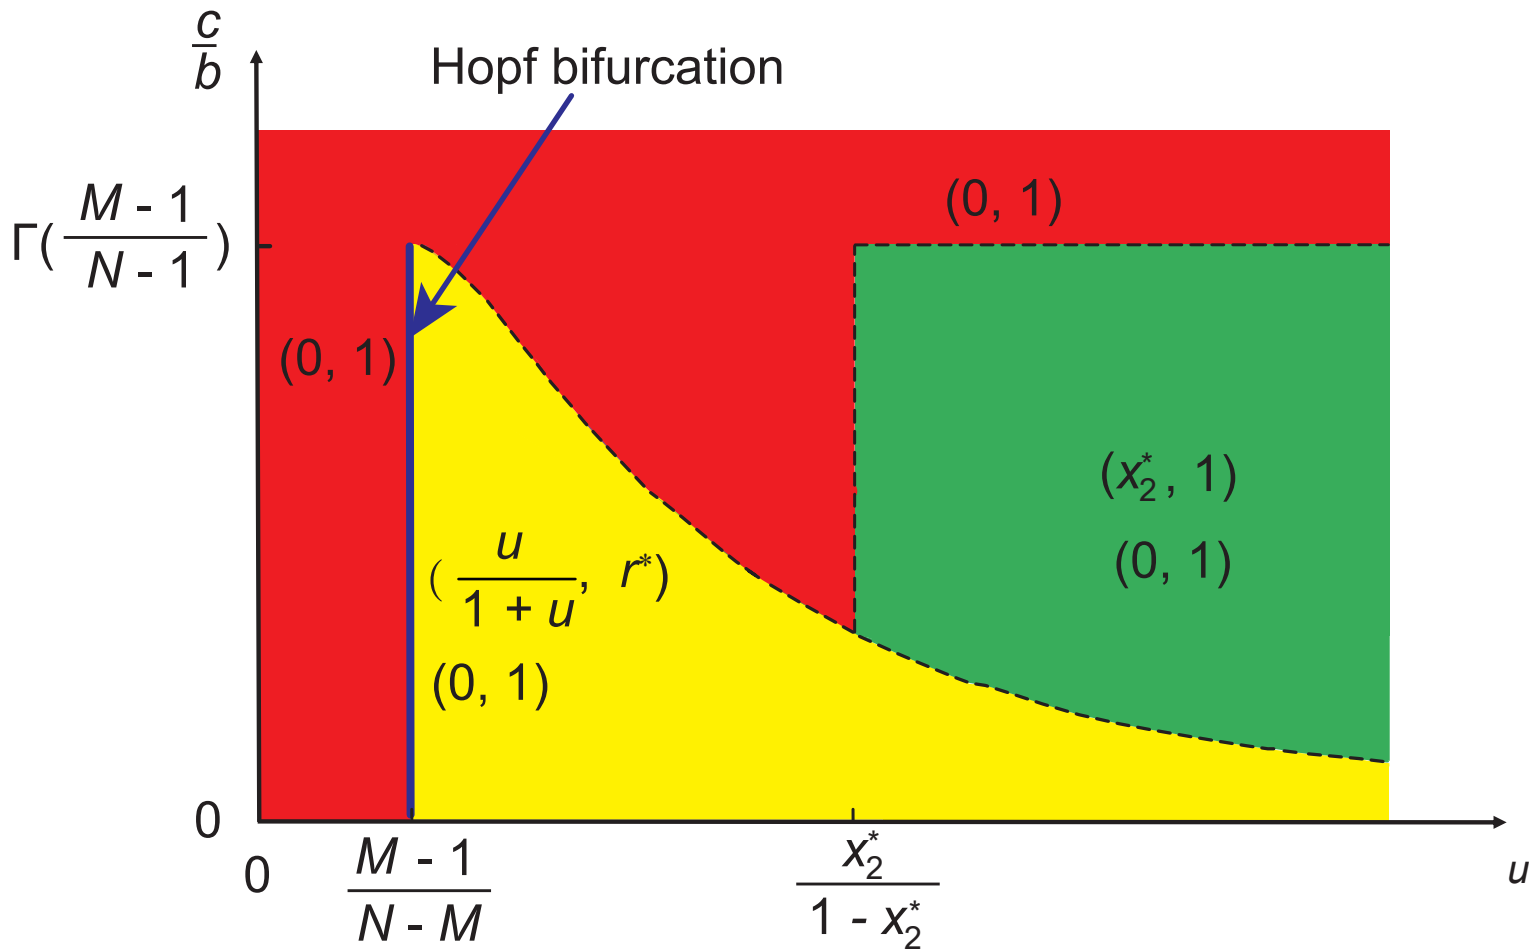

One interior fixed point

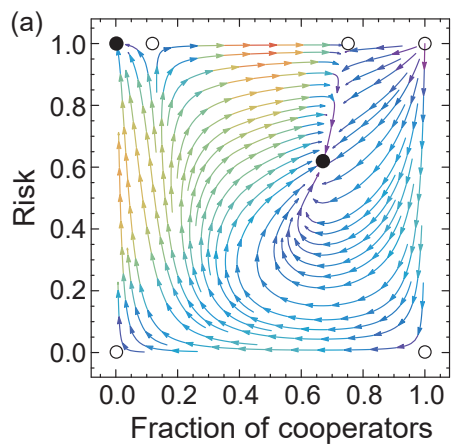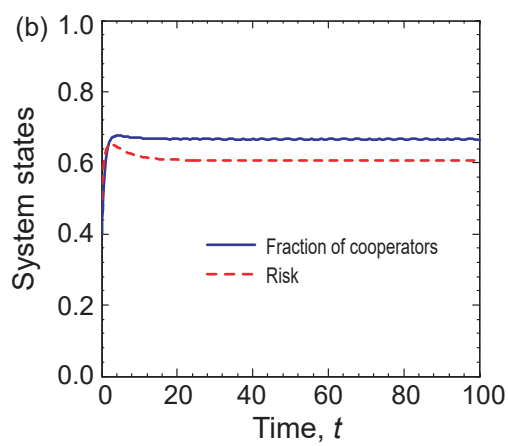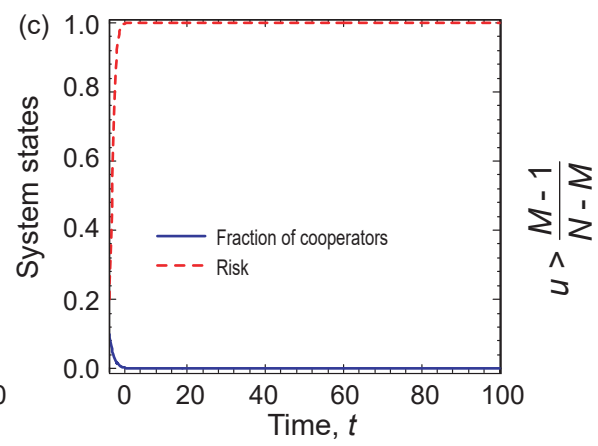

$$u > \frac{M-1}{N-M}$$

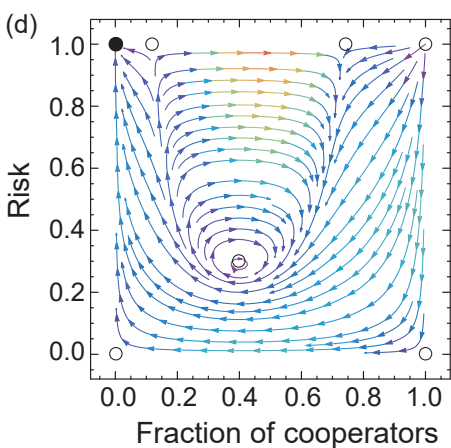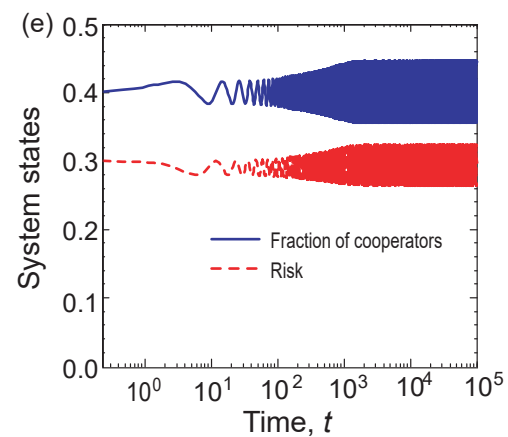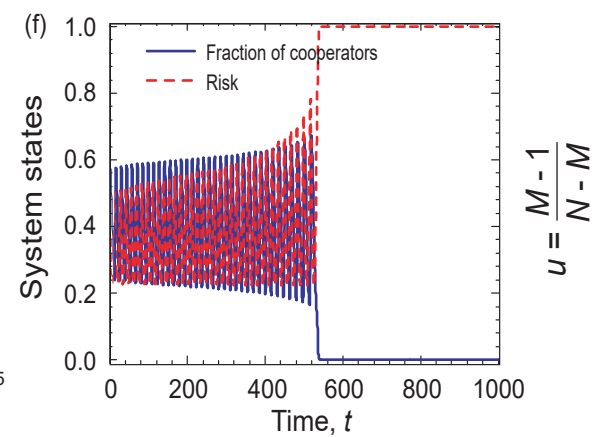

$$u = \frac{M-1}{N-M}$$

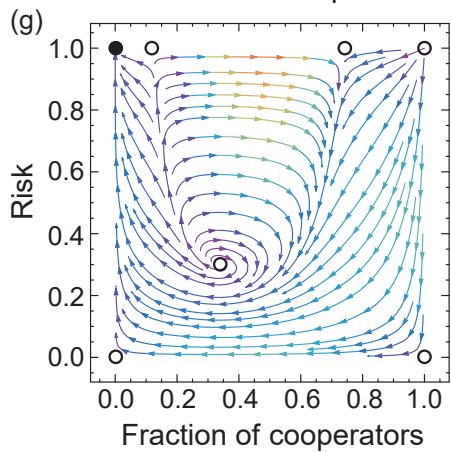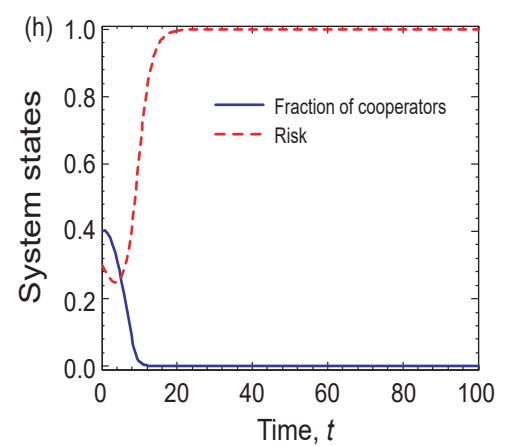

$$u < \frac{M-1}{N-M}$$

No interior fixed point

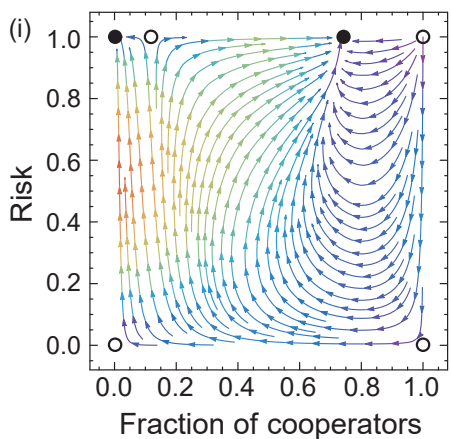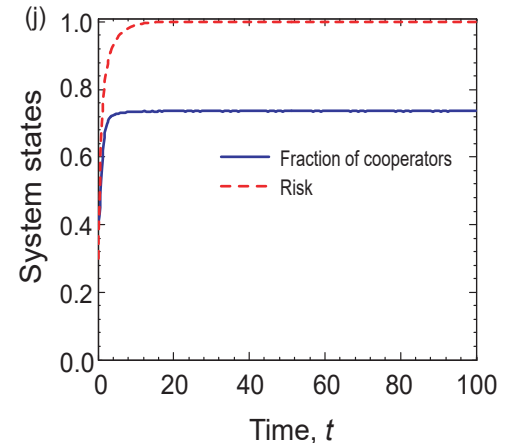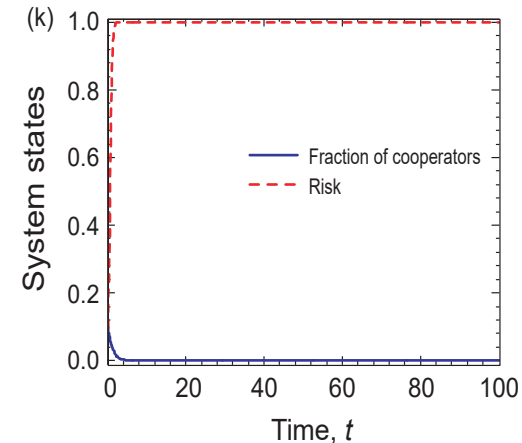

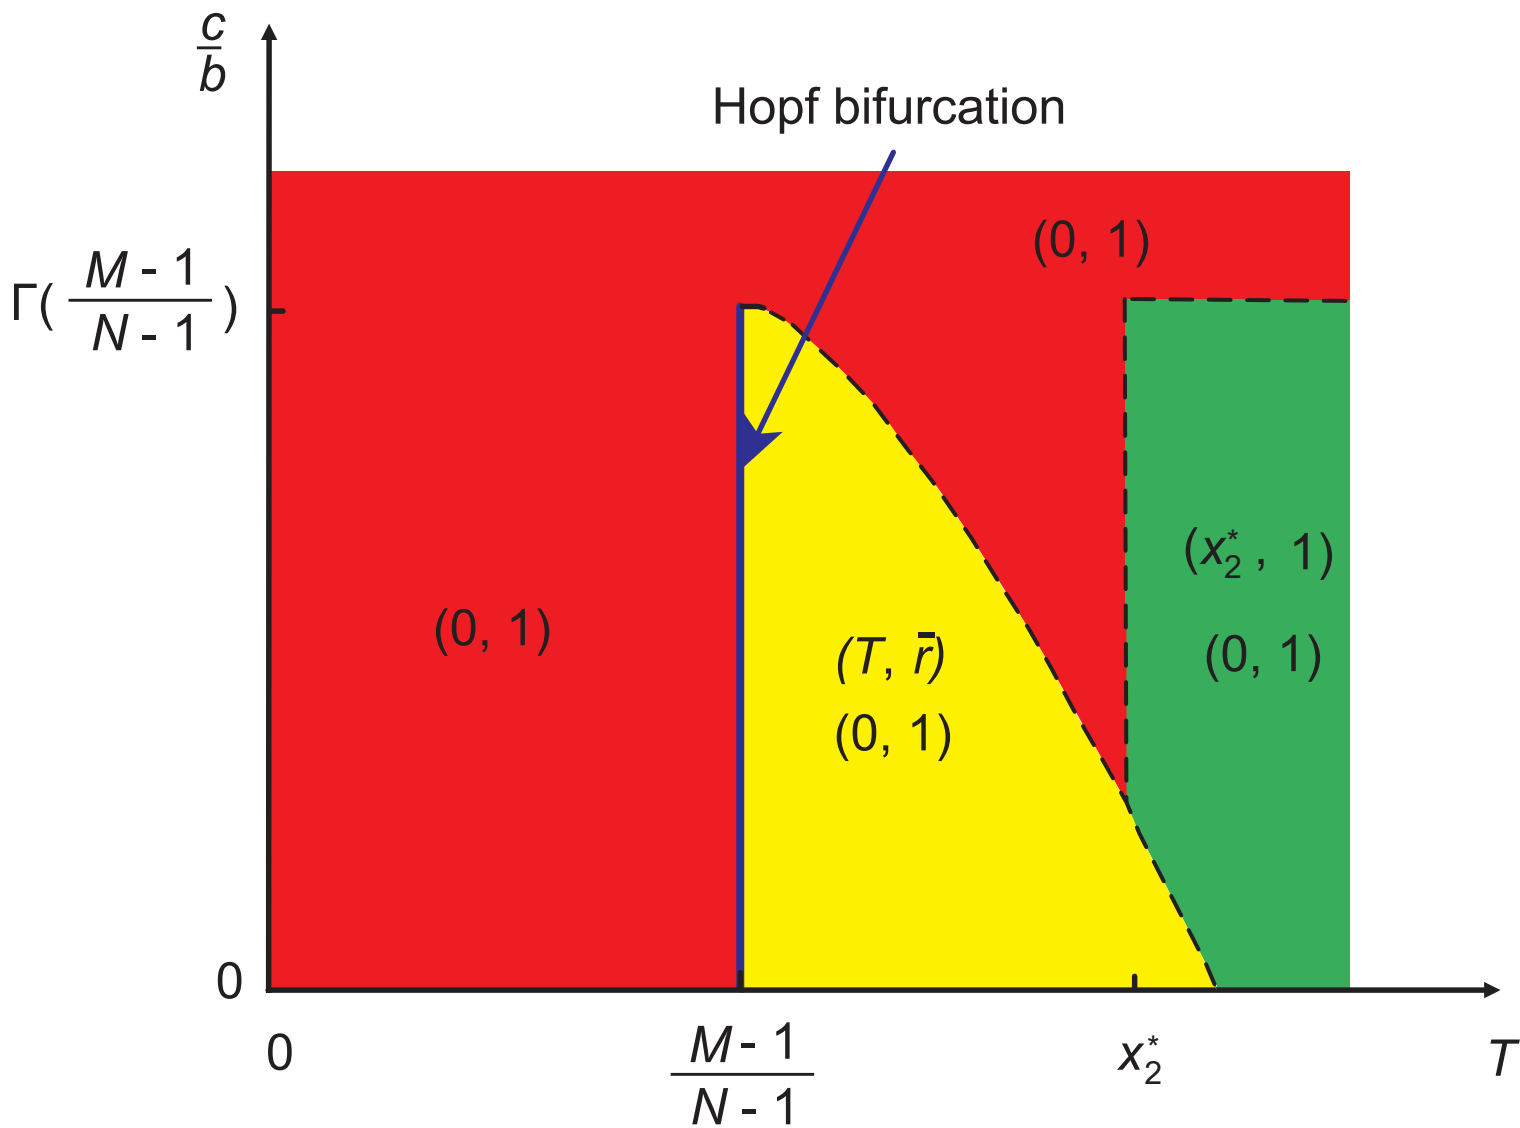

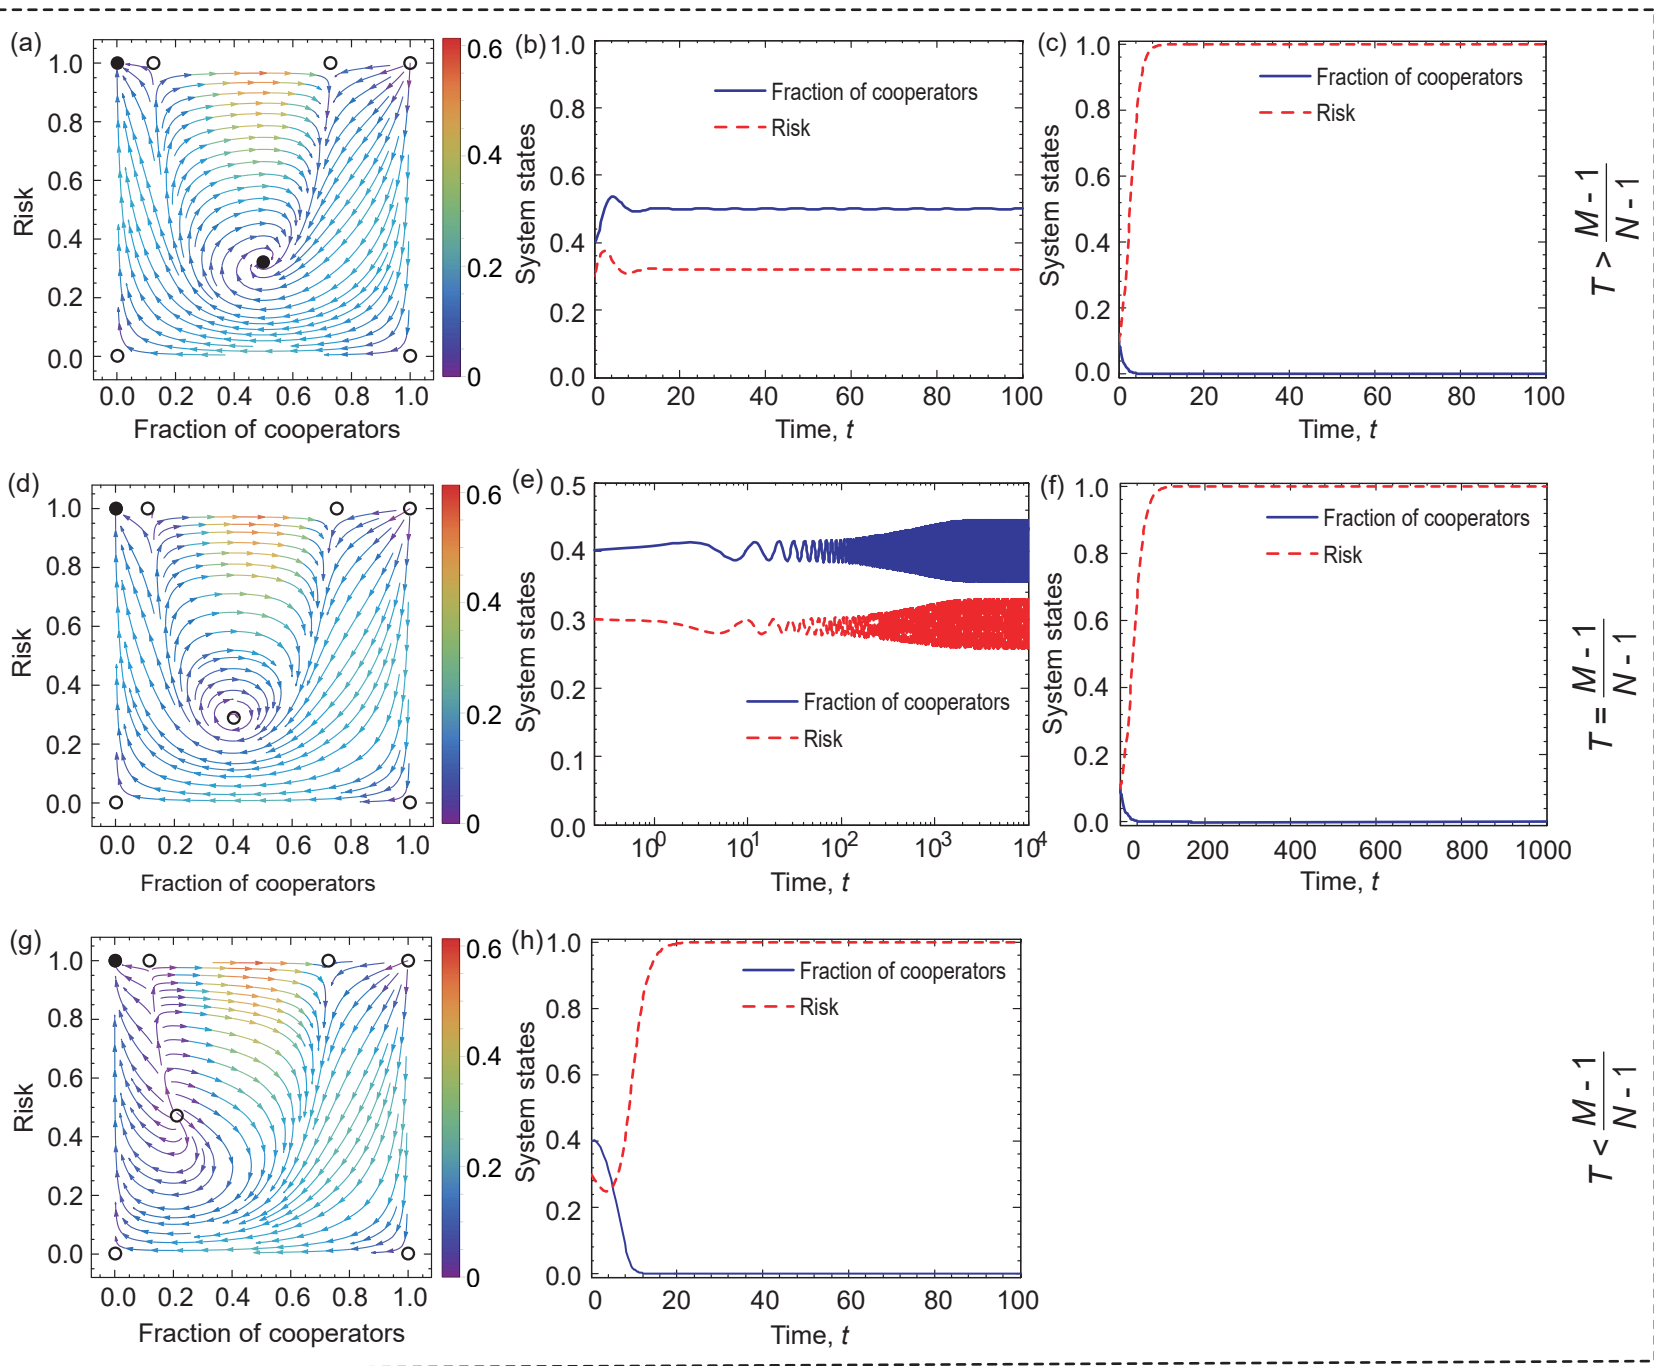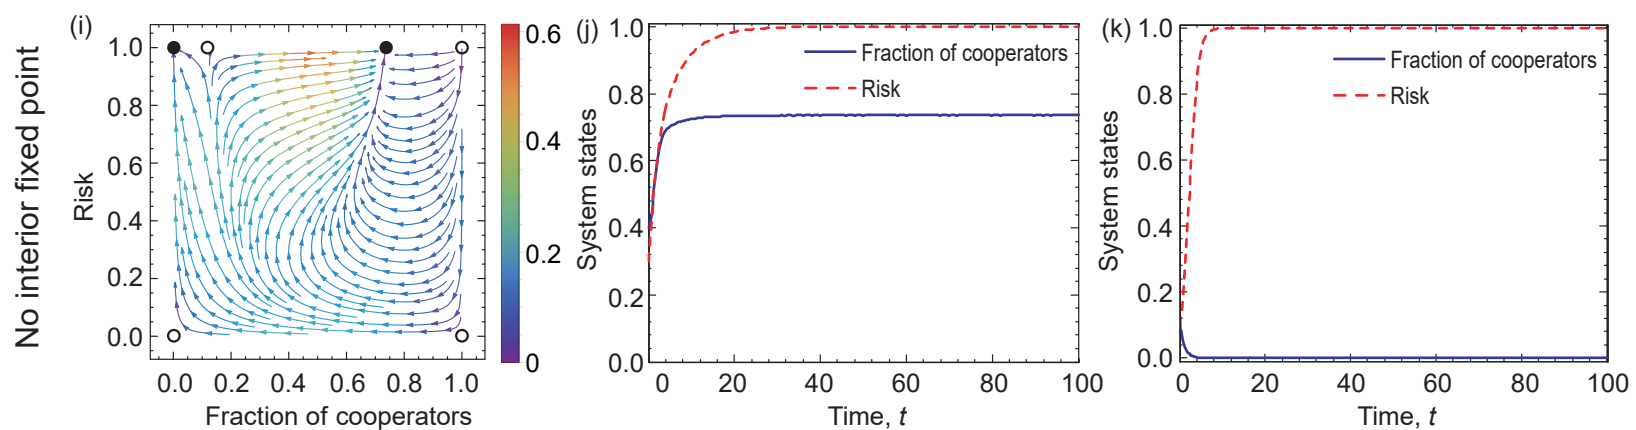

$$u > \frac{M - 1}{N - M}$$

$$u = \frac{M - 1}{N - M}$$

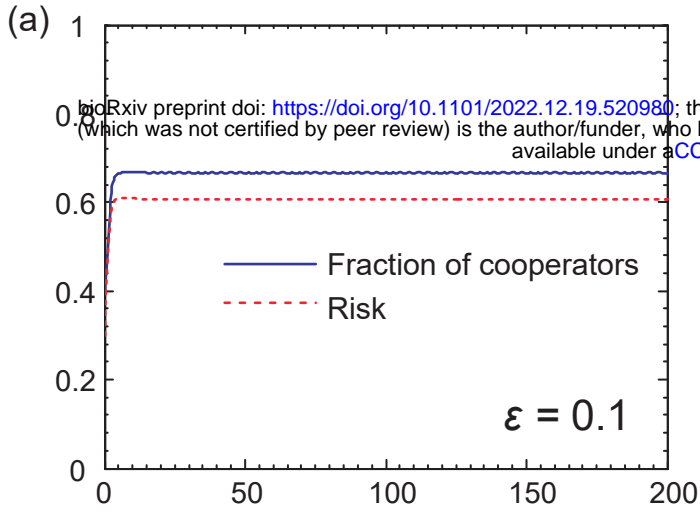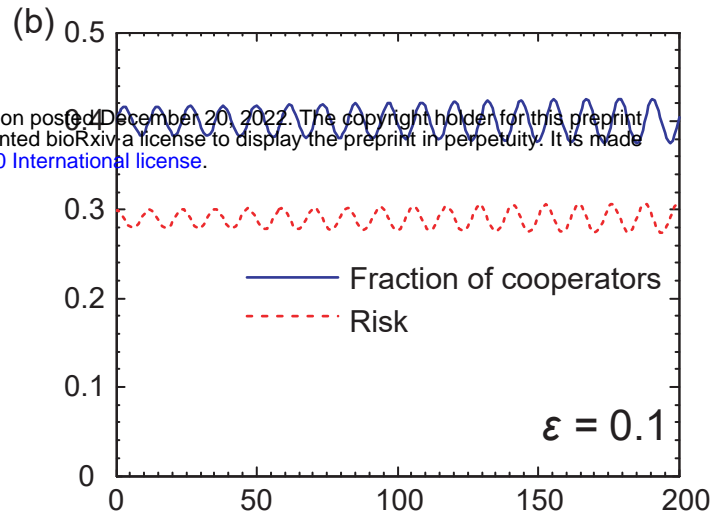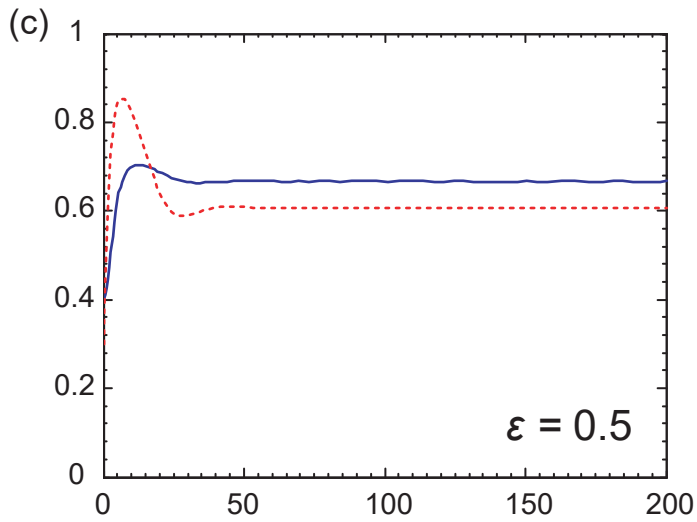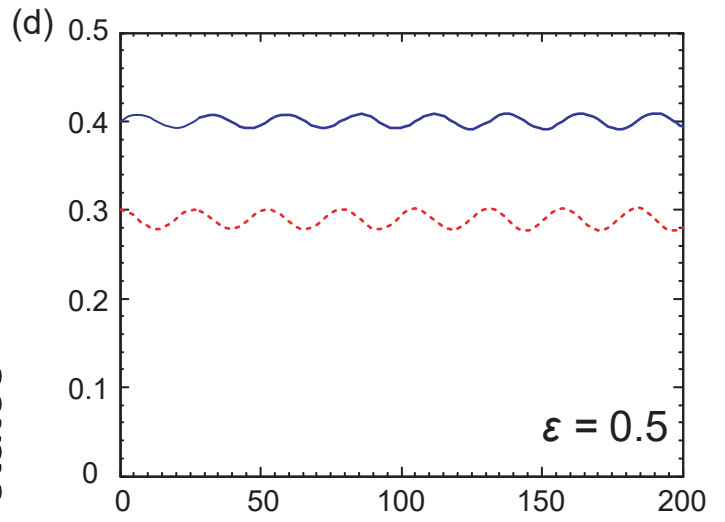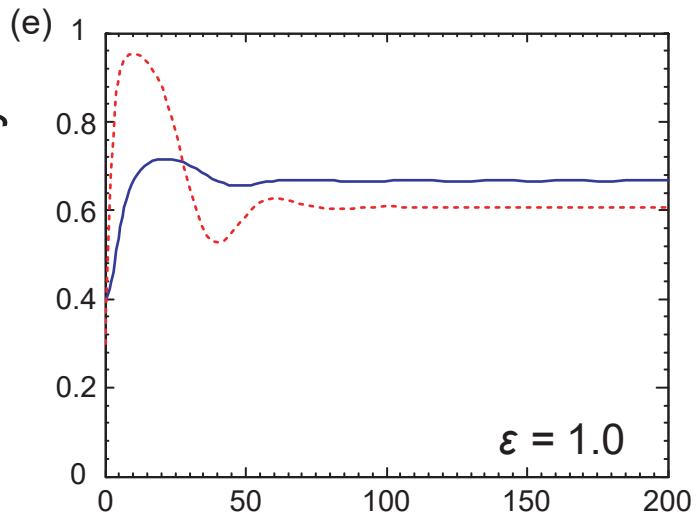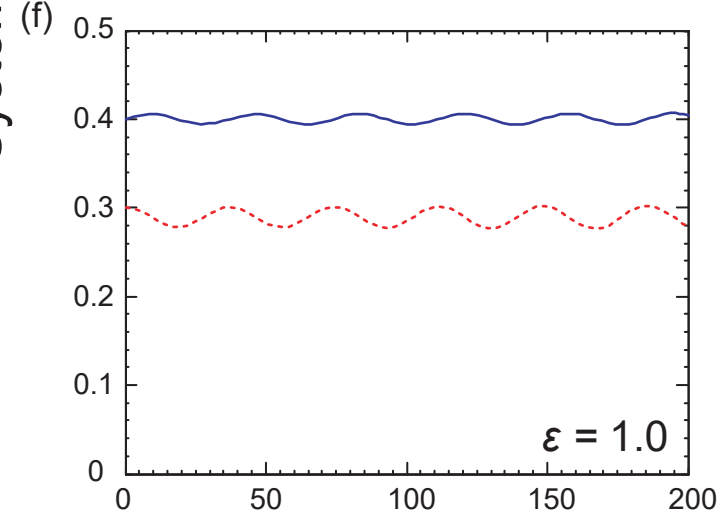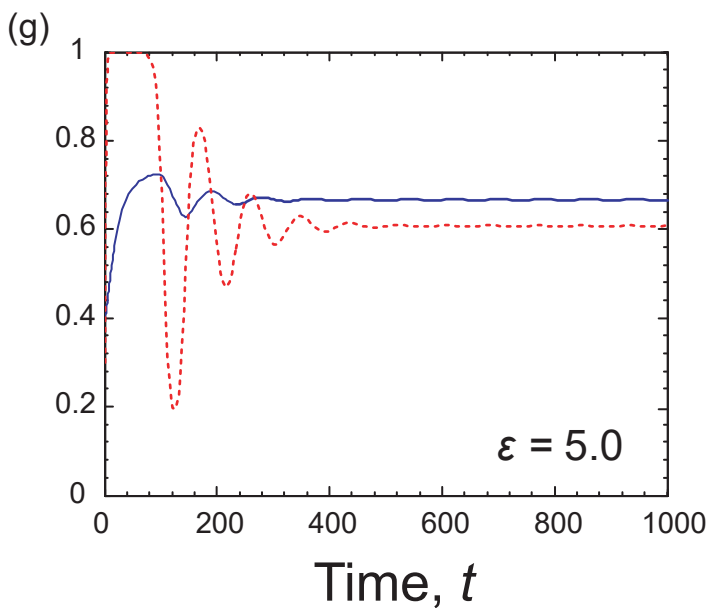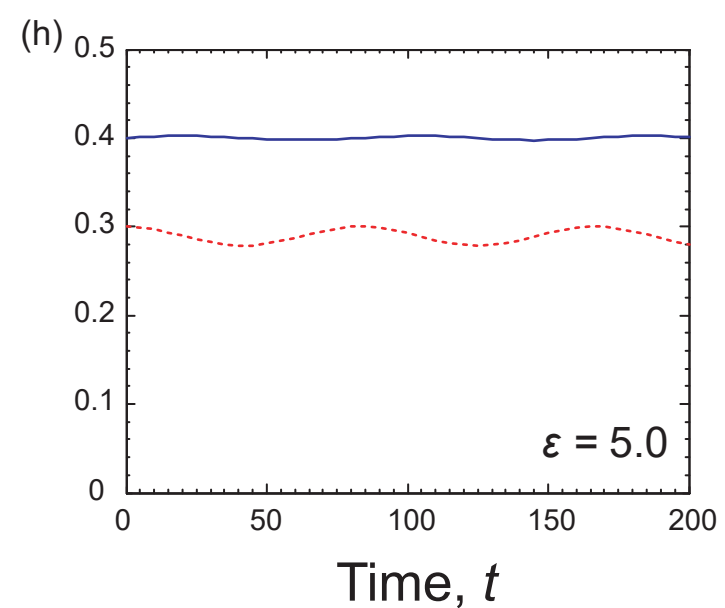

$$T > \frac{M-1}{N-1}$$

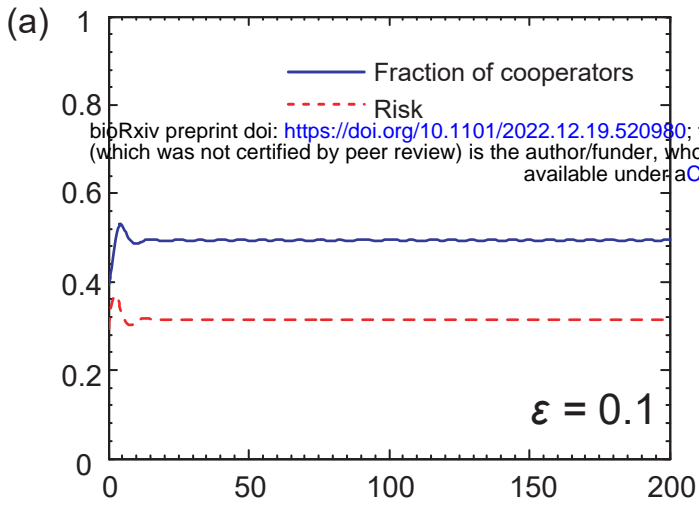

$$T = \frac{M-1}{N-1}$$

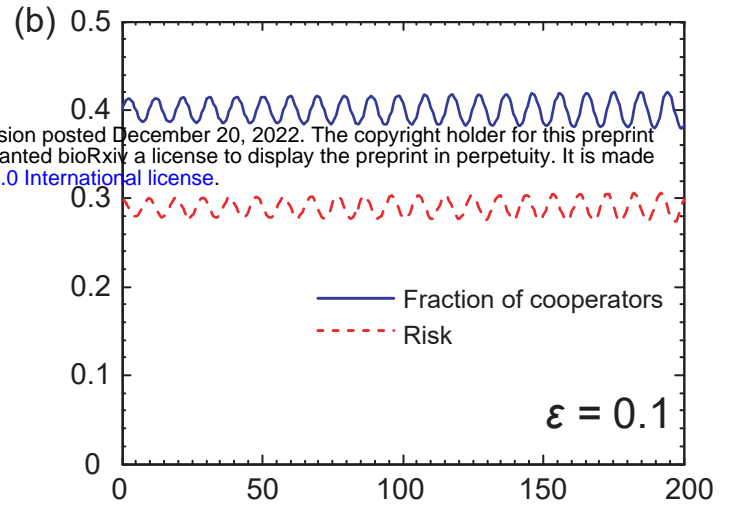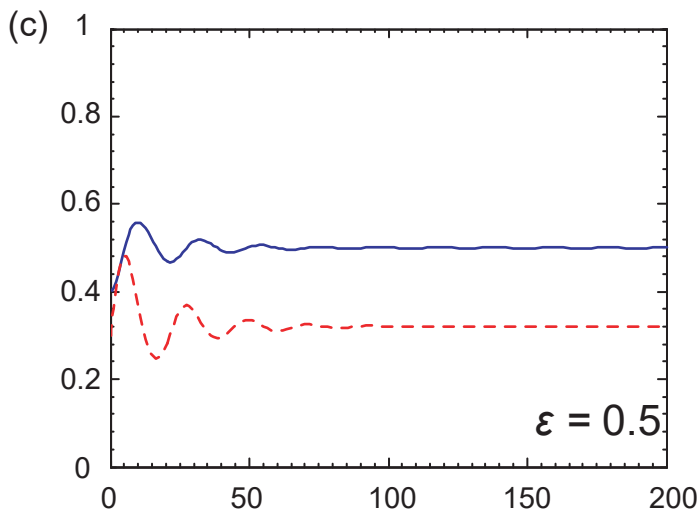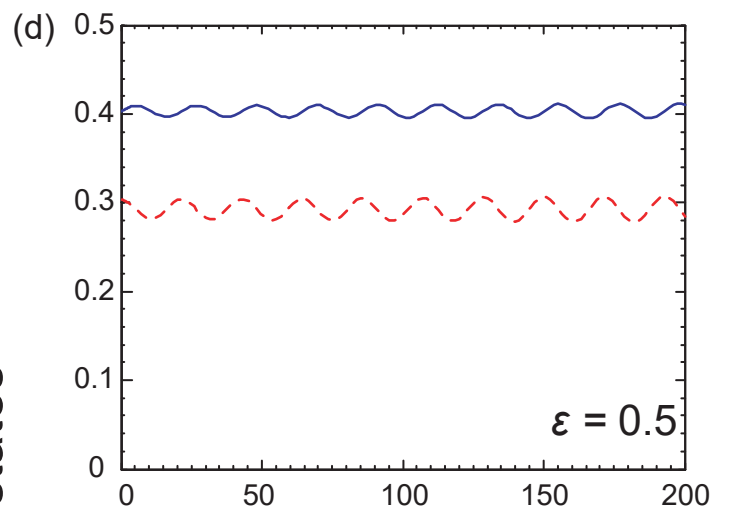

System states

System states

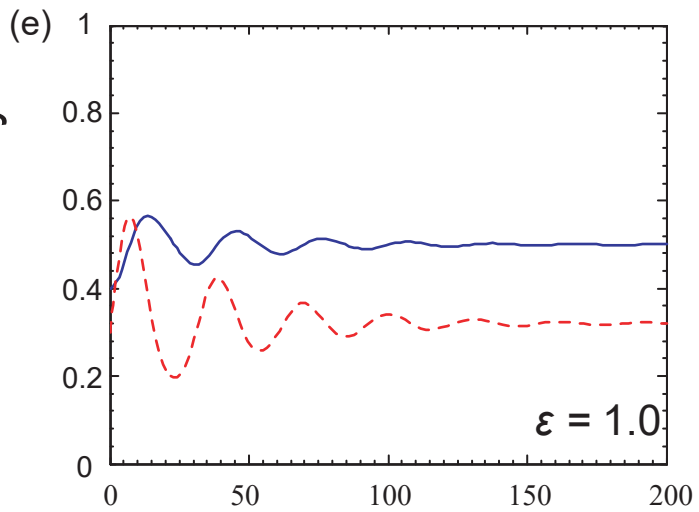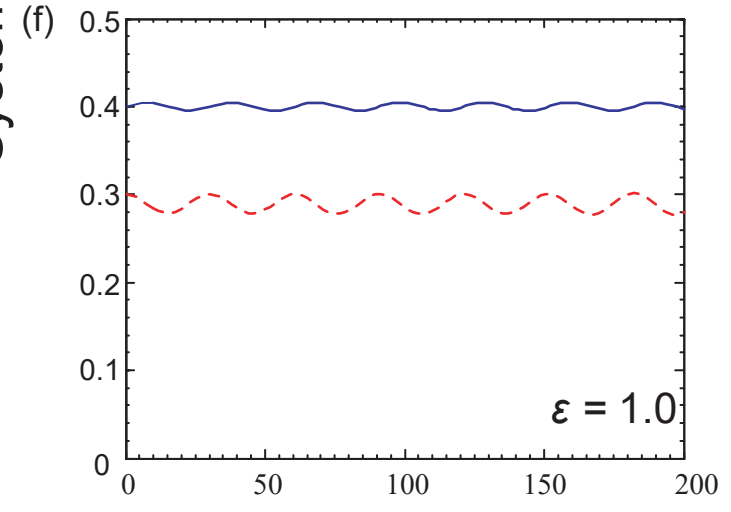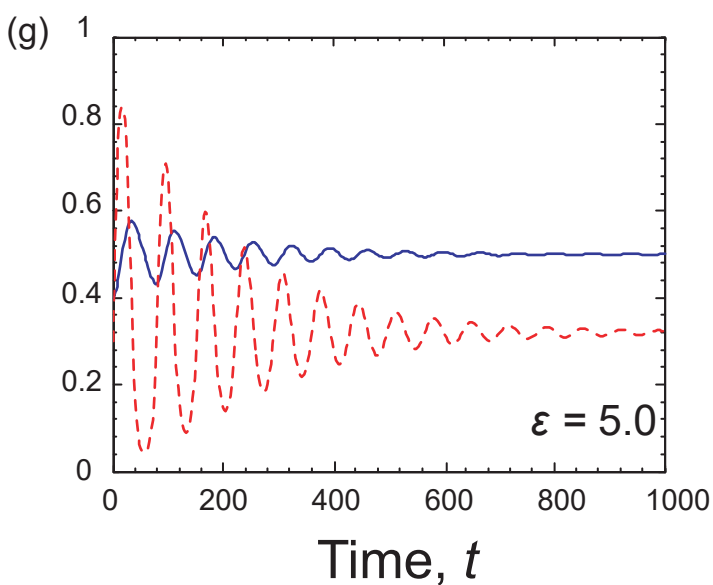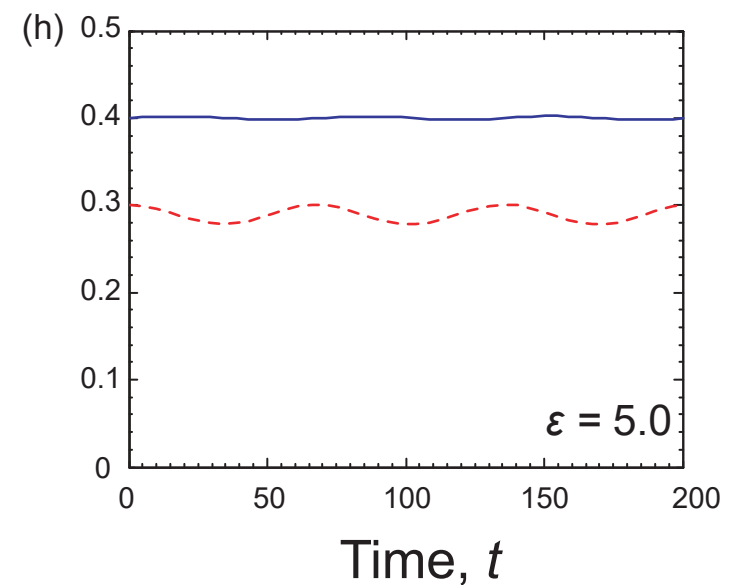

Source: https://www.biorxiv.org/content/10.1101/2022.12.19.520980v1.full.pdf
